# Supplementary material for: Moringa Oleifera Lam. in Cardiometabolic Disorders: A Systematic Review of Recent Studies and Possible Mechanism of Actions
Source: PubMed Central journal article supplement (PMC9006177; doi:10.3389/fphar.2022.792794), 2022-03-30
Supplement: DataSheet1.pdf [file DataSheet1.pdf]

## *Supplementary Material*

### **Moringa oleifera in cardiometabolic disorders: A systematic review of recent studies and possible mechanism of actions**

**Melva Louisa<sup>1\*</sup>, Cyntia Gracesella Hutami Patintingnan<sup>2</sup>, Bantari WK Wardhani<sup>3</sup>**

<sup>1</sup> Department of Pharmacology and Therapeutics, Faculty of Medicine, Universitas Indonesia, Jakarta, Indonesia

<sup>2</sup> Master Program in Biomedical Sciences, Faculty of Medicine, Universitas Indonesia, Jakarta, Indonesia

<sup>3</sup> Department of Pharmacology and Therapeutics, Faculty of Military Pharmacy, Indonesia Defense University, West Java, Indonesia

**\*Correspondence:**

Corresponding Author

[melva.louisa@gmail.com](mailto:melva.louisa@gmail.com)

## Table of Contents

| <b>Supplementary Material</b>                            | <b>Page</b> |
|----------------------------------------------------------|-------------|
| Table S1. Search terms used in the study                 | 3           |
| Table S2. Nonclinical studies of <i>Moringa oleifera</i> | 4           |
| Table S3. Clinical Studies of <i>Moringa oleifera</i>    | 27          |
| References                                               | 29          |

**Table S1. Search terms used in the study**

| Database | Search Term                                                                                                                                                                                                                                                                                                                                                                                                                                                                                                                                                                                                                                                                                                          |
|----------|----------------------------------------------------------------------------------------------------------------------------------------------------------------------------------------------------------------------------------------------------------------------------------------------------------------------------------------------------------------------------------------------------------------------------------------------------------------------------------------------------------------------------------------------------------------------------------------------------------------------------------------------------------------------------------------------------------------------|
| PubMed   | TITLE/ABS Moringa oleifera AND ((cardiovascular diseases [MeSH]) OR (Metabolic Diseases [MeSH]) OR (Blood Glucose [MeSH]) OR (Obesity [MeSH]) OR (hypertension [MeSH]) OR (Kidney Failure [MeSH]) OR (Molecular Mechanisms of Pharmacological Actions [MeSH]) OR (Pharmacological and Toxicological Phenomena [MeSH]) OR Oxidative Stress [MeSH]) OR (Inflammation [MeSH]) OR (Gastrointestinal Microbiome [MeSH]) OR (Immune System [MeSH]))                                                                                                                                                                                                                                                                        |
| Scopus   | (TITLE-ABS-KEY (moringa AND oleifera ) AND TITLE-ABS-KEY (((cardiovasc*) OR (cardiac) OR (cvd) OR (ischemi*) (metaboli*) OR (lipid) OR (cholesterol) OR (ldl) OR (hdl) OR (tg) OR (tryglyceride*) OR (diabetes) OR (dm) OR (dmt2) OR (insulin) OR (hyperglyc*) OR (hypoglyc*) OR (glucose) OR (kidney) OR (hypertens*) OR (blood AND pressure) OR (diuretic) OR (pharmacolog*) OR (toxic*) OR (oxidative AND stress) OR (antioxidant) OR (inflam*) OR (microbiome ) OR (microbiota) OR (immune))))))                                                                                                                                                                                                                 |
| CENTRAL  | #1 Moringa oleifera<br>#2 MeSH descriptor [cardiovascular diseases] explode all trees<br>#4 MeSH descriptor [Metabolic Diseases] explode all trees<br>#5 MeSH descriptor [Blood Glucose] explode all trees<br>#6 MeSH descriptor [Obesity] explode all trees<br>#7 MeSH descriptor [Hypertension] explode all trees<br>#8 MeSH descriptor [Kidney Failure] explode all trees<br>#9 MeSH descriptor [Oxidative stress] explode all trees<br>#10 MeSH descriptor [Inflammation] explode all trees<br>#11 MeSH descriptor [Gut microbiome] explode all trees<br>#12 MeSH descriptor [Immune system] explode all tree<br>#13 insulin<br>#12 glucose<br>#13 lipid<br>#14 cholesterol<br>#15 diuretic<br>#1 AND {#2 - #15} |

**Table S2. Nonclinical studies of *Moringa oleifera***

| Author, year           | Type of extracts/ main bioactive compound used | Methods of extracts/ bioactive preparation                                                                          | Yield of preparation from raw material (wt/wt) | <i>In vitro/ in vivo</i> models used                                             | Treatment/ duration                                   | Effects                                                                                                                                                                                                                                                                                                                                                                              | Mechanism                                                        | Toxicity                 |
|------------------------|------------------------------------------------|---------------------------------------------------------------------------------------------------------------------|------------------------------------------------|----------------------------------------------------------------------------------|-------------------------------------------------------|--------------------------------------------------------------------------------------------------------------------------------------------------------------------------------------------------------------------------------------------------------------------------------------------------------------------------------------------------------------------------------------|------------------------------------------------------------------|--------------------------|
| Abarikwu, 2017 [1]     | MO seed oil                                    | Cold pressed from freshly shelled moringa seeds                                                                     | Not reported                                   | HgCl <sub>2</sub> -induced hepato- and nephrotoxicity in Male Wistar albino rats | 1.798 mg/kg BW p.o. three times per week for 21 days. | <ul style="list-style-type: none"> <li>- Amelioration of kidney and liver injury</li> <li>- ↓ MDA, SOD, CAT, GST, GSH.</li> <li>- normalization of creatinine, bilirubin GGT, LDH, ALP</li> </ul>                                                                                                                                                                                    | Antioxidant                                                      | No toxicity was observed |
| Abd El Latif, 2014 [2] | MO leaves aqueous extracts                     | Dried water extract from fresh green leaves MO. Reconstitution were done in distilled water prior to administration | 22%                                            | Alloxan-induced diabetes in rats                                                 | 250 mg/kg BW p.o for 18 days                          | <ul style="list-style-type: none"> <li>- Improvement of blood glucose, TG, cholesterol, and MDA levels.</li> <li>- Normalization of hepatic pyruvate carboxylase mRNA expressions.</li> <li>- ↑ PC in hepatic tissues.</li> <li>- ↑ body weight</li> <li>- restoration of liver FAS mRNA expression</li> <li>- Improved histological structure of the liver and pancreas.</li> </ul> | Glucose metabolism, lipid metabolism, hepatoprotective           | Not reported             |
| Abd Eldaim, 2017 [3]   | MO leaves aqueous extract                      | Dried water extract from fresh green leaves MO                                                                      | Not reported                                   | Alloxan-induced diabetes in Wistar albino rats                                   | 250 mg/kg BW p.o for 18 days                          | <ul style="list-style-type: none"> <li>- Protective effect on hepatic and pancreatic tissues</li> <li>- Normalized hepatic GSH, SOD, CAT, and glycogen synthase gene expression of glycogen synthase.</li> <li>- ↓ blood glucose</li> <li>- ↓ hepatic lipid peroxidation,</li> </ul>                                                                                                 | Antioxidant, glucose metabolism, antiapoptotic, hepatoprotective | Not reported             |

|                        |                                     |                                                                                                                                   |                                     |                                                           |                                                                                                                     |                                                                                                                                                                                                                     |                                                  |                                                                                           |
|------------------------|-------------------------------------|-----------------------------------------------------------------------------------------------------------------------------------|-------------------------------------|-----------------------------------------------------------|---------------------------------------------------------------------------------------------------------------------|---------------------------------------------------------------------------------------------------------------------------------------------------------------------------------------------------------------------|--------------------------------------------------|-------------------------------------------------------------------------------------------|
|                        |                                     |                                                                                                                                   |                                     |                                                           |                                                                                                                     | - ↓ PC and caspase 3 gene expression.                                                                                                                                                                               |                                                  |                                                                                           |
| Abd Rani, 2019 [4]     | MO ethanol extract and its isolates | Leaves, seeds, and pods were macerated separately. Fractionation were done sequentially using hexane, ethyl-acetate, and acetone. | Leaves: 5%<br>Seed: 3.3%<br>Pod: 3% | RBL-2H3 cells                                             | 7.81, 15.62 and 31.25 µg/mL                                                                                         | All extracts and isolated compounds significantly inhibited beta-hexosaminidase, histamine, and cytokine (IL-4 and TNF-α) release.                                                                                  | Anti-inflammation                                | Cytotoxicity test: at 7.81 - 31.25 µg/mL, extracts and isolates were found not cytotoxic. |
| Abd-Elhakim, 2021[5]   | MO ethanol extract                  | Hydro distillation techniques with ethanol                                                                                        | Not reported                        | Melamine-induced hepatorenal impairment in male S.D. rats | - 800 mg/kg BW/day p.o for 2 weeks as prophylaxis.<br>- 800 mg/kg BW/day p.o. for 2 weeks, co-treated with melamine | - ↑ CAT, GPx, and BCL-2 expression<br>- ↓ p53 expression.<br>- Suppressed expression of the proinflammatory cytokine, KIM-1 and TIMP-1.<br>- Improved hepatorenal efficacy when given simultaneously with melamine. | Antioxidant, anti-inflammation.                  | Not reported                                                                              |
| Abdel Fattah, 2020 [6] | MO leaves aquatic extract           | Dried MO from fresh leaves macerated in cold water, boiled for 15 min, and then filtered.                                         | Not reported                        | Lead acetate–induced liver injury in male Wistar rats     | 200 mg/kg BW p.o for 4 weeks                                                                                        | - Amelioration of weight gain reduction<br>- ↓ TC, TGs, LDL-C AST, ALT, ALP, TNF-α.<br>- ↑ in HDL-c, TP, albumin, GSH, and SOD.<br>- ↓ DNA fragmentation<br>- improved hepatic lesions and tissue score damage.     | Antioxidant, lipid metabolism, hepatoprotective. | Not reported                                                                              |

|                      |                            |                                                                                                                             |              |                                                                                 |                                                                                                                                                        |                                                                                                                                                                                                                                                                                                                                                                                                                    |                                                |              |
|----------------------|----------------------------|-----------------------------------------------------------------------------------------------------------------------------|--------------|---------------------------------------------------------------------------------|--------------------------------------------------------------------------------------------------------------------------------------------------------|--------------------------------------------------------------------------------------------------------------------------------------------------------------------------------------------------------------------------------------------------------------------------------------------------------------------------------------------------------------------------------------------------------------------|------------------------------------------------|--------------|
| Abdel-Daim, 2020 [7] | MO leaves methanol extract | Powdered leaves MO were extracted using methanol 70%.                                                                       | Not reported | Lead acetate–induced liver injury in male Wistar rats                           | 250 mg/kg BW i.p for 14 days                                                                                                                           | <ul style="list-style-type: none"> <li>- ↓ in relative kidney weight, urea, and creatinine.</li> <li>- Attenuation of abnormal histopathological features</li> <li>- ↑ CAT, GPx1.</li> <li>- ↓ TNF-<math>\alpha</math>, IL-1<math>\beta</math>, and NF-<math>\kappa</math>B</li> <li>- Downregulation of iNOS.</li> <li>- Inhibiting the pro-apoptotic proteins and enhancing the antiapoptotic protein</li> </ul> | Antioxidant, anti-inflammation, anti-apoptotic | Not reported |
| Abdel-Daim, 2020 [8] | MO leaves ethanol extract  | Fine powdered leaves MO was extracted using ethanol absolute.                                                               | 7.8%         | Cobalt-induced renal oxidative damage and inflammatory injury in male S.D rats. | Prophylaxis: 400 mg/kgBW/day for 2 weeks alone, 4 weeks with cobalt<br><br>Treatment: 400 mg/kgBW/day for 4 weeks with cobalt, then for 2 weeks alone. | <ul style="list-style-type: none"> <li>- Improved body weight gain.</li> <li>- ↓ urea, creatinine, MDA, and 8-OHdG.</li> <li>- ↑ globulin, SOD, CAT, GSH.</li> <li>- ↓ CRP, MPO, TNF-<math>\alpha</math>, and NO.</li> <li>- Down-regulation of NF-<math>\kappa</math>B and IL-6.</li> <li>- More effective when + CoCl<sub>2</sub> as a prophylactic regimen.</li> </ul>                                          | Antioxidant, anti-inflammation                 | Not reported |
| Abdou, 2018 [9]      | MO leaves ethanol extract  | MO was macerated in ether for 72 h, and then evaporated. The residue was further macerated in ethanol and then freeze dried | Not reported | TiO <sub>2</sub> nanoparticle s-induced nephrotoxicity in male albino rats.     | 400 mg/kgBW for 60 days                                                                                                                                | <ul style="list-style-type: none"> <li>- ↓ creatinine, urea, uric acid, renin, MDA.</li> <li>- ↑ SOD, GST, GSH, GPx, total thiols.</li> <li>- ↓ TNF-<math>\alpha</math>, NF-<math>\kappa</math>B, HSP70.</li> <li>- Upregulation of Nrf2 and HO-1 mRNA.</li> <li>- Downregulation of KIM1 mRNA.</li> </ul>                                                                                                         | Antioxidant, anti-inflammation                 | Not reported |

|                      |                                                                         |                                                                                                                                                                                                                                                                                                    |      |                                                    |                                                                                       |                                                                                                                                                                                                                                                                                                                                                                                                                                                                                                            |                                                                 |                                                   |
|----------------------|-------------------------------------------------------------------------|----------------------------------------------------------------------------------------------------------------------------------------------------------------------------------------------------------------------------------------------------------------------------------------------------|------|----------------------------------------------------|---------------------------------------------------------------------------------------|------------------------------------------------------------------------------------------------------------------------------------------------------------------------------------------------------------------------------------------------------------------------------------------------------------------------------------------------------------------------------------------------------------------------------------------------------------------------------------------------------------|-----------------------------------------------------------------|---------------------------------------------------|
| Abou-Zeid, 2021 [10] | MO leaves ethanol extract                                               | Powdered leaves MO was extracted using ethanol absolute.                                                                                                                                                                                                                                           | 7.8% | Tilmicosin-induced renal damage in male S.D. rats. | 400 and 800 mg/kg BW for 7 days                                                       | <ul style="list-style-type: none"> <li>- ↓ creatinine, urea, sodium, potassium, and GGT activity</li> <li>- ↑ TP and albumin</li> <li>- ↓ renal tissue H<sub>2</sub>O<sub>2</sub> and MDA</li> <li>- ↑ SOD, GPx</li> <li>- ↓ TNF-<math>\alpha</math>, IL-1<math>\beta</math></li> <li>- ↓ Desmin, nestin and vimentin mRNA expression</li> <li>- Histopathological alterations in renal glomeruli, tubules, and interstitial tissue.</li> <li>- ↓ in frequencies and severities of nephropathy.</li> </ul> | Antioxidant, anti-inflammation, nephroprotective                | Not reported                                      |
| Abu-Zeid, 2021[11]   | MO leaves ethanol extract, and MO leaves extract-Selenium nanoparticles | <ul style="list-style-type: none"> <li>● Powdered leaves MO was extracted using ethanol absolute.</li> <li>● Filtered suspension of dried leaves MO was mixed with deionized water, selenious acid, ascorbic acid subsequently.</li> <li>● It forms a SeNPs nano-solution of MO leaves.</li> </ul> | 7.8% | Melamine induced nephrotoxicity in male S.D. rats  | 800 mg/kg BW extract and 200 $\mu$ g mg/kg BW nanoparticle extract daily for 28 days. | <ul style="list-style-type: none"> <li>- ↓ creatinine, urea, BUN.</li> <li>- ↑ TAC, GSH, SOD, CAT, GPx, MDA, PCO, TNF-<math>\alpha</math>.</li> <li>- Down-regulation of Bax, Caspase-3, FasL mRNA expression.</li> <li>- Up-regulation of Bcl2, PCNA, and Ki-67.</li> <li>- ↓ in severity and frequency of nephrotoxic lesions but did not show the reestablishment of normal histology.</li> </ul>                                                                                                       | Anti-inflammation, antioxidant, Antiapoptotic, nephroprotective | No signs of toxicity.                             |
| Adedapo, 2015 [12]   | MO food supplement extracted                                            | Powdered leaves of MO was extracted using methanol.                                                                                                                                                                                                                                                | 9.6% | Carrageenan-induced paw edema, histamine-          | 50, 100 and 200 mg/kg BW                                                              | <ul style="list-style-type: none"> <li>- ↓ size of edema, the number of writhes, licking time, and frequency.</li> </ul>                                                                                                                                                                                                                                                                                                                                                                                   | Analgesic, anti-inflammation, antioxidant.                      | Acute toxicity test:<br>- 200, 400, 800 mg/kg BW: |

|                          |                                                 |                                                                                                                                                               |                                                                    |                                                                                                                 |                                            |                                                                                                                                                                                                         |                                                  |                                                                                                                                                                                              |
|--------------------------|-------------------------------------------------|---------------------------------------------------------------------------------------------------------------------------------------------------------------|--------------------------------------------------------------------|-----------------------------------------------------------------------------------------------------------------|--------------------------------------------|---------------------------------------------------------------------------------------------------------------------------------------------------------------------------------------------------------|--------------------------------------------------|----------------------------------------------------------------------------------------------------------------------------------------------------------------------------------------------|
|                          | with methanol                                   |                                                                                                                                                               |                                                                    | induced pedal edema, acetic acid-induced pain, formalin-induced pain, in female white Wistar strain albino rats |                                            | - Dose-related free radical-scavenging property                                                                                                                                                         |                                                  | slightly dull and were fully recovered after 48h, no death<br>- 1600 mg/kgBW: dull, severe lethargy. 2 out of 5 died.<br>- 3200 mg/kg BW: Severe lethargy, rough hair coat. 4 out of 5 died. |
| Adepoju-Bello, 2017 [13] | MO leaves water or ethanol, or methanol extract | Cold-maceration using five different solvents: (1) 100% Methanol, (2) 100% Ethanol, (3) Water-Methanol (50/50), (4) Water- Ethanol (50/50) and (5) 100% Water | (1) 2.49 %<br>(2) 3.17 %<br>(3) 9.42 %<br>(4) 8.52 %<br>(5) 6.47 % | Alloxan-induced diabetes in male and female Wistar rats                                                         | 200 - 400 mg/kg BW once daily for 24 days. | - ↓ blood glucose levels.<br>- 50% ethanolic extract at 300 mg/kg showed superior antioxidant properties, weight restorative, and pronounced hypoglycemic effects.                                      | Glucose homeostasis, antioxidant                 | Not reported.                                                                                                                                                                                |
| Aektham marat, 2019 [14] | MO leaves aqueous extract                       | Air-dried powdered leaves MO were extracted in distilled water.                                                                                               | 4.975%                                                             | L-NAME-induced hypertension in Male Wistar rats                                                                 | 30 and 60 mg/kg BW once daily for 3 weeks. | - ↓ BP and tachycardia.<br>- ↓ impairment of acetylcholine-induced relaxation<br>- ↓ hyperreactivity of adrenergic-mediated contraction.<br>- ↓ vascular O <sub>2</sub> production<br>- ↓ MDA, SOD, CAT | Antihypertensive, vasculoprotective, antioxidant | Not reported.                                                                                                                                                                                |



|                          |                             |                                                                                          |              |                                                                                                          |                                                     |                                                                                                                                                                                                                                                    |                                  |                                                                                                                                                                   |
|--------------------------|-----------------------------|------------------------------------------------------------------------------------------|--------------|----------------------------------------------------------------------------------------------------------|-----------------------------------------------------|----------------------------------------------------------------------------------------------------------------------------------------------------------------------------------------------------------------------------------------------------|----------------------------------|-------------------------------------------------------------------------------------------------------------------------------------------------------------------|
| Aektham marat, 2020 [15] | MO leaves aqueous extract.  | Air-dried powdered leaves MO were extracted in distilled water.                          | 4.975%       | Mesenteric arterial beds isolated from L-NAME-induced hypertension in male Wistar rats                   | 0.001–3 mg in 0.1 mL injection volume               | <ul style="list-style-type: none"> <li>- Relaxation in methoxamine pre-contracted arterial beds.</li> <li>- Inhibitory effect on CaCl<sub>2</sub> and phenylephrine-induced contractions.</li> </ul>                                               | Vasculoprotective                | Not reported.                                                                                                                                                     |
| Aektham marat, 2020 [16] | MO leaves aqueous extract.  | Air-dried powdered leaves MO were extracted in distilled water.                          | 4.975%       | L-NAME-induced hypertension in male Wistar rats<br><br>Human pulmonary artery endothelial cells (HPAEC). | Rats: 1–30 mg/kg BW<br><br>HPAEC: 3–30 µg/mL.       | <ul style="list-style-type: none"> <li>- ↓ in MAP when administered alone.</li> <li>- Induced relaxation in methoxamine pre-contracted mesenteric arterial beds.</li> <li>- Induced NO production in HPAEC.</li> </ul>                             | Vasculoprotective                | Cytotoxicity test: At 0.1–300 µg/mL did not significantly influence the cell viability. The viability was decreased at the concentrations of 1000 and 3000 µg/mL. |
| Aju, 2019 [17]           | MO leaves methanol extract. | Dried leaf powder was serially extracted with petroleum ether, chloroform, and methanol. | Not reported | Streptozotocin-induced diabetes in male albino S.D. rats                                                 | 300 mg/kg BW once daily for 60 days                 | <ul style="list-style-type: none"> <li>- ↓ blood glucose and HbA<sub>1c</sub>, TBARS, HP, and conjugated dienes (CD).</li> <li>- ↑ plasma insulin, SOD, CAT, GPx, GR, GSH.</li> <li>- Improve the histopathology of the diabetic heart.</li> </ul> | Glucose homeostasis, antioxidant | Not reported                                                                                                                                                      |
| Akinrinde, 2020 [18]     | MO leaves methanol extract. | Air-dried powdered leaves MO were extracted sequentially in n-hexane and two             | Not reported | Ischemia reperfusion-induced acute kidney injury in Wistar rats.                                         | 200 and 400 mg/kg BW for 7 days before IR induction | <ul style="list-style-type: none"> <li>- ↓ BUN, creatinine, NO, MDA, AOPP, carbonyls.</li> <li>- Enhancement of thiols and GSH levels, GPx, and GST activities.</li> </ul>                                                                         | Antioxidant, Nephroprotective    | Not reported                                                                                                                                                      |

|                      |                             |                                                              |              |                                                      |                                          |                                                                                                                                                                                                                                                                                                                                                                              |                                                                 |              |
|----------------------|-----------------------------|--------------------------------------------------------------|--------------|------------------------------------------------------|------------------------------------------|------------------------------------------------------------------------------------------------------------------------------------------------------------------------------------------------------------------------------------------------------------------------------------------------------------------------------------------------------------------------------|-----------------------------------------------------------------|--------------|
|                      |                             | times of methanol-water (80:20).                             |              |                                                      |                                          | - Improvement in renal histology.                                                                                                                                                                                                                                                                                                                                            |                                                                 |              |
| Al-Malki, 2015 [19]  | MO seed powder.             | Not reported                                                 | Not reported | Streptozotocin-induced diabetes in male albino rats. | 50 and 100 mg/kg BW in food for 4 weeks. | <ul style="list-style-type: none"> <li>- ↓ water consumption, fasting blood sugar, MDA, IgG, IgA, IL-6, HbA1c, α-amylase, BUN, uric acid, creatinine, sodium, and potassium.</li> <li>- ↓ food intake, body weight gain, food efficiency ratio (FER).</li> <li>- ↑ CAT, SOD, GSH</li> <li>- Restored the kidney and pancreatic tissue of diabetic rats to normal.</li> </ul> | Glucose metabolism, antioxidant, Nephroprotective               | Not reported |
| Albasher, 2020 [20]  | MO leaves methanol extract. | Fine powdered leaves MO was extracted using 70% of methanol. | 14.3%        | Lead-induced hepatotoxicity in male Wistar rats.     | 250 mg/kg BW p.o for 14 days             | <ul style="list-style-type: none"> <li>- ↓ Pb(II) concentration</li> <li>- ↓ ALT, AST, MDA, NO, TNFα, IL-1β levels, NF-κB p65 level, and iNOS mRNA expression.</li> <li>- ↓ Bax and caspase-3, and ↑ in Bcl-2 levels.</li> <li>- ↑ GSH, SOD, CAT, GPx, and GR.</li> <li>- Prevention of tissue injury.</li> </ul>                                                            | Antioxidant, anti-inflammation, antiapoptotic, hepatoprotective | Not reported |
| Alhakmani, 2013 [21] | MO flowers ethanol extract. | Powder of MO flowered were macerated in 70% ethanol.         | 8.69%        | Egg albumin                                          | 100-500 µg/mL                            | <ul style="list-style-type: none"> <li>- Dose-dependent scavenging activity</li> <li>- inhibition of denaturation of egg albumin.</li> </ul>                                                                                                                                                                                                                                 | Anti-inflammation, antioxidant                                  | Not reported |

|                    |                                                                                       |                                                                               |              |                                                                                                                                      |                                                                                                                                                       |                                                                                                                                                                                                                                   |                                                 |                                                                                                                                                                                                             |
|--------------------|---------------------------------------------------------------------------------------|-------------------------------------------------------------------------------|--------------|--------------------------------------------------------------------------------------------------------------------------------------|-------------------------------------------------------------------------------------------------------------------------------------------------------|-----------------------------------------------------------------------------------------------------------------------------------------------------------------------------------------------------------------------------------|-------------------------------------------------|-------------------------------------------------------------------------------------------------------------------------------------------------------------------------------------------------------------|
| Anudeep, 2016 [22] | MO seeds                                                                              | Kernels were obtained from matured and dried MO seeds.                        | 6.5%         | Splenocytes from male Swiss albino                                                                                                   | 0.01 to 10 µg                                                                                                                                         | <ul style="list-style-type: none"> <li>- ↑ proliferation of splenocytes at low concentration</li> <li>- ↑ NO production up to 6-fold.</li> </ul>                                                                                  | Anti-inflammation                               | Not reported                                                                                                                                                                                                |
| Araújo, 2013 [23]  | MO seeds aqueous extract, cMoL (coagulant MO lectin); WSMoL (water-soluble MO lectin) | Crushed MO seeds were extracted in distilled water.                           | Not reported | <p>Carrageenan-induced pleurisy in male Balb/c mice</p> <p>Peritoneal macrophages isolated from LPS-stimulated male Balb/c mice.</p> | <p>Seed extract: 125, 250 or 500 mg/kg</p> <p>Seed extract (6.25–50 µg/mL), diluted seed extract (50–400 µg/mL) or cMoL or WSMoL (6.25–100 µg/mL)</p> | <ul style="list-style-type: none"> <li>- ↓ Leukocyte migration, myeloperoxidase activity, NO, TNF-<math>\alpha</math> and IL-1<math>\beta</math>.</li> <li>- ↓ number of leukocytes in the lungs.</li> </ul>                      | Anti-inflammation                               | Seed extract and cMoL are potentially cytotoxic for PBMCs, while the diluted seed extract and WSMoL are not cytotoxic to these cells. Acute toxicity test (2000 mg/kg) showed no signs of systemic toxicity |
| Arise, 2016 [24]   | MO flowers ethanol extract                                                            | Air-dried MO from fresh flowers were pulverized and extracted in 95% ethanol. | Not reported | Streptozotocin-induced diabetes in male albino rats.                                                                                 | 100, 200, 300 mg/kg BW once daily, 21 days.                                                                                                           | <ul style="list-style-type: none"> <li>- ↓ blood glucose, atherogenic index, TG, HDL-C, LDL-C, TC, MDA levels, AST, ALP.</li> <li>- ↑ body weight gain, SOD, CAT.</li> </ul>                                                      | Glucose and lipid metabolism, antioxidant       | Not reported                                                                                                                                                                                                |
| Atta, 2017 [25]    | MO leaves methanol extract                                                            | Powders of MO leaves were extracted with 95% methanol.                        | Not reported | CCl <sub>4</sub> -induced hepatotoxicity in male and female S.D. rats                                                                | 100, 200, 400 mg/kg BW p.o, 4 weeks.                                                                                                                  | <ul style="list-style-type: none"> <li>- ↑ GPx, CAT, GSH, TP, and albumin.</li> <li>- ↓ TC, TG, ALT, AST, MCH, MHCH, RDW, WBC, urea, creatinine.</li> <li>- Improvement of the histopathological picture of the liver.</li> </ul> | Antioxidant, lipid metabolism, hepatoprotective | Acute toxicity test: No symptoms of morbidity or mortality. LD <sub>50</sub> > 4500 mg/kg BW p.o                                                                                                            |

|                    |                           |                                                                                                                                                               |                          |                                                          |                                                                |                                                                                                                                                                                                                                                                                           |                                                                  |              |
|--------------------|---------------------------|---------------------------------------------------------------------------------------------------------------------------------------------------------------|--------------------------|----------------------------------------------------------|----------------------------------------------------------------|-------------------------------------------------------------------------------------------------------------------------------------------------------------------------------------------------------------------------------------------------------------------------------------------|------------------------------------------------------------------|--------------|
| Attakpa, 2017 [26] | MO leaves aqueous extract | MO leaves were suspended in distilled water and boiled for 30 min.                                                                                            | Not reported             | Spontaneously hypertensive rats.                         | 200, 400, 600 mg/kg BW in food, 8 weeks.                       | <ul style="list-style-type: none"> <li>- ↓ blood glucose, TG, LDL, TC levels, BP, arachidonic acid</li> <li>- Inhibition of T cell proliferation, anti-CD3- stimulated T cell blastogenesis, IL-2 secretion</li> <li>- ↑ basal Ca<sup>2+</sup>, EPA, DHA</li> </ul>                       | Anti-inflammation, Glucose & lipid metabolism, anti-hypertensive | Not reported |
| Azad, 2017 [27]    | Leaves ethanol extract    | Powdered leaves of MO were extracted in 80% ethanol.                                                                                                          | Not reported             | Streptozotocin (STZ) induced diabetes in Long Evan rats. | 500 mg/kg BW p.o                                               | <ul style="list-style-type: none"> <li>- ↓ serum glucose but doesn't affect insulin secretion.</li> <li>- ↓ in the glucose absorption by inhibiting α-amylase</li> <li>- ↑ in gut motility and decrease in starch catabolism.</li> <li>- ↓ amount of glucose in the dialysate.</li> </ul> | Glucose metabolism                                               | Not reported |
| Azevedo, 2018 [28] | MO leaves aqueous extract | Powdered leaves of MO were macerated in distilled water.                                                                                                      | Not reported             | Streptozotocin-induced diabetes in Wistar rats.          | 100 mg/kg BW p.o + 200μL of 10% extract topically for 10 days. | <ul style="list-style-type: none"> <li>- ↓ blood glucose, wound area, TNF-α, IL-1β, and IL-6.</li> <li>- ↑ collagen fibers, fibroblasts, vascular neof ormation and macrophages</li> </ul>                                                                                                | Anti-inflammation, wound healing                                 | Not reported |
| Bao, 2020 [29]     | Niazirin from MO seeds    | MO seeds were boiled twice, followed with extraction using a macroporous resin column and silica gel chromatography. Niarizin was prepared by medium pressure | purity of niazirin: >95% | Saline-induced metabolic syndrome in male db/db mice.    | 10 and 20 mg/kg/BW p.o for 4 weeks.                            | <ul style="list-style-type: none"> <li>- ↓ body weight, water, and food intake,</li> <li>- improved hyperglycemia, insulin resistance, inflammation, carbohydrate and lipid metabolism, non-alcoholic fatty liver.</li> </ul>                                                             | Anti-inflammation, glucose & lipid metabolism                    | Not reported |

|                     |                                                           |                                                                      |              |                                                                                                             |                                                                                 |                                                                                                                               |                                     |                                                                             |
|---------------------|-----------------------------------------------------------|----------------------------------------------------------------------|--------------|-------------------------------------------------------------------------------------------------------------|---------------------------------------------------------------------------------|-------------------------------------------------------------------------------------------------------------------------------|-------------------------------------|-----------------------------------------------------------------------------|
|                     |                                                           | liquid chromatography from contracted fraction.                      |              |                                                                                                             |                                                                                 | - Improved carbohydrate and lipid metabolisms via the AMPK signaling pathway.                                                 |                                     |                                                                             |
| Bitrus, 2018 [30]   | MO leaves methanol extract                                | Powdered MO leaves were extracted using absolute methanol.           | 10.6%        | High cholesterol diet and Carbimazole induced hyperlipidemia and cardiac injury in male albino Wistar rats. | 200 mg/kg BW p.o daily for six weeks.                                           | - ↓ TC, LDL, TG, VLDL<br>- ↓ CK-MB, LDH, and AST.<br>- Improvement of histological findings of the heart.                     | Lipid metabolism, cardio-protective | Not reported                                                                |
| Chen, 2012 [31]     | Moringa oleifera leaves hexane extract                    | Freeze-dried powder of MO leaves were extracted in hexane (1:2 w/v). | Not reported | Monocrotaline-induced pulmonary hypertension in rats                                                        | Acute: 1.5, 4.5 and 15.0 mg/kg i.v.<br><br>Chronic: 4.5 mg/kg BW i.p for 7 days | - ↓ pulmonary arterial pressure.<br>- ↑ heart rate<br>- ↑ SOD<br>- ↓ thickening of vessel walls of the histological sections. | Antioxidant, vasculoprotective      | Not reported                                                                |
| Cheraghi, 2017 [32] | N,α-L-rhamnopyranosyl vincosamide isolated from MO leaves | Not reported                                                         | Not reported | Doxorubicin-induced cardiac toxicity in albino rats.                                                        | 200, 400, 800, 1000, and 2000 µg/ml i.p every other day for 2 weeks.            | - ↑ GSH, SOD.<br>- ↓ MDA, and mRNA levels of β-MHC, ANP, BNP.                                                                 | Antioxidant, cardioprotective       | Not reported                                                                |
| Chin, 2018 [33]     | MO leaves aqueous extract                                 | MO leaves were extracted using cold-maceration in distilled water.   | Not reported | Streptozotocin and high-fat-diet-induced diabetes in                                                        | 0.1, 0.5, and 1% film dressing                                                  | - ↑ hydroxyproline and COL1α1 levels.<br>- Downregulation of IL-6, TNF-α, and MCP-1 expression at 1%.                         | Anti-inflammation, wound healing    | Acute dermal toxicity: no mortality, no abnormalities on the skin, fur, and |

|                    |                               |                                                                          |      |                                                                                             |                                                                     |                                                                                                                                                                                                                                                      |                                                   |                                                                                                                                |
|--------------------|-------------------------------|--------------------------------------------------------------------------|------|---------------------------------------------------------------------------------------------|---------------------------------------------------------------------|------------------------------------------------------------------------------------------------------------------------------------------------------------------------------------------------------------------------------------------------------|---------------------------------------------------|--------------------------------------------------------------------------------------------------------------------------------|
|                    |                               | The extract was formulated with sodium alginate-pectin in film dressing. |      | male S.D. rats.                                                                             |                                                                     | <ul style="list-style-type: none"> <li>- Enhancement of wound healing rate</li> <li>- Promote collagen deposition</li> <li>- Acceleration of wound contraction rate.</li> </ul>                                                                      |                                                   | behavioral patterns up to 1% dose. No signs of edema, erythema, or any symptoms of toxicity on the skin.                       |
| Chumark, 2008 [34] | MO leaves extract             | MO leaves were boiled in distilled water for 15 min.                     | 10%  | Human LDL;<br><br>High cholesterol diet-induced hyperlipidemia in New Zealand white rabbits | 1, 10, 30 and 50 µg/ml.<br><br>0.1 g/kg BW p.o. daily for 12 weeks. | <ul style="list-style-type: none"> <li>- Delayed the lag-time of conjugated diene formation.</li> <li>- ↓ TBARS formation.</li> <li>- ↓ in TC, LDL, HDL, TG.</li> <li>- Reduced the formation of internal carotid atherosclerotic plaque.</li> </ul> | Antioxidant, lipid metabolism, vasculoprotective, | Not reported                                                                                                                   |
| Cui, 2019 [35]     | MRP-1 isolated from MO roots. | Dried MO roots were boiled in water to extract the polysaccharide MRP-1. | 4.6% | RAW264.7 cells treated by LPS                                                               | 12.5, 25, 50, and 100 µg/ml.                                        | <ul style="list-style-type: none"> <li>- Inhibition of NO, IL-6, IL-1β and TNF-α production.</li> <li>- Inhibit mRNA expression levels of iNOS and TNF-α.</li> </ul>                                                                                 | Anti-inflammation                                 | Lower concentrations (12.5, 25, 50, and 100 µg/ml) had no cytotoxicity while higher concentration (200 µg/ml) showed toxicity. |
| Das, 2012 [36]     | MO leaves ethanol extract.    | Powdered MO leaves were extracted using 80% ethanol.                     | 10%  | High-fat diet-induced hyperlipidemia in Swiss                                               | 150 mg/kg BW p.o for 15 days                                        | <ul style="list-style-type: none"> <li>- ↑ FRAP, GSH</li> <li>- ↓ MDS, AST, ALT, and ALP.</li> <li>- Prevention of liver damage</li> <li>- Prevention of diet-induced</li> </ul>                                                                     | Antioxidant, hepatoprotective                     | Not reported                                                                                                                   |

|                          |                                                     |                                                                                                                                                                                            |                    |                                                       |                            |                                                                                                                                                                                                                                                                                                                    |                                                  |                          |
|--------------------------|-----------------------------------------------------|--------------------------------------------------------------------------------------------------------------------------------------------------------------------------------------------|--------------------|-------------------------------------------------------|----------------------------|--------------------------------------------------------------------------------------------------------------------------------------------------------------------------------------------------------------------------------------------------------------------------------------------------------------------|--------------------------------------------------|--------------------------|
|                          |                                                     |                                                                                                                                                                                            |                    | strain male albino mice                               |                            | obesity and early signs of fatty liver.                                                                                                                                                                                                                                                                            |                                                  |                          |
| de Yurre, 2020 [37]      | Water-Soluble Lectin (WSMoL) isolated from MO seeds | Extraction was done with distilled water, followed with filtration and centrifugation. Afterward, lectin was further saturated, centrifugated, precipitated dialyzed with distilled water. | Not reported       | Male C57BL/6 mice                                     | 5 mg/kg BW p.o for 21 days | <ul style="list-style-type: none"> <li>- No change in blood glucose levels, body weight, glucose tolerance or insulin resistance.</li> <li>- No alterations in ECG parameters, cardiac action potential duration, left ventricular and mitochondrial function.</li> </ul>                                          | None                                             | No toxicity was observed |
| Dou Z et al., 2019 [38]  | MO leaves extract                                   | a non-digestible fraction of MO leaves was suspended in sterilized basic nutrient growth medium.                                                                                           | Not clearly stated | In vitro gastrointestinal model                       | 5 g/50 mL                  | <ul style="list-style-type: none"> <li>- ↓ free radical scavenging activity after gastric and small intestine digestion.</li> <li>- ↓ pH in the colon.</li> <li>- ↑ SCFA and diversity of gut microbiota.</li> </ul>                                                                                               | Antioxidant, gut microbiome modulation           | Not reported             |
| Edeogu et al., 2019 [39] | MO seed oil                                         | MO seed oil was produced by cold press method with no additional chemicals.                                                                                                                | Not reported       | Gentamicin-induced nephrotoxicity in male Wistar rats | 5 ml/kg BW p.o for 16 days | <ul style="list-style-type: none"> <li>- ↓ kidney weight, urea, and creatinine.</li> <li>- ↓ MDA IL-6, IL-1b, TNF-α, NO, iNOS, NF-κB, caspase-3.</li> <li>- ↑ GSH, SOD, CAT, and GPx activities.</li> <li>- Histopathological alterations were ameliorated but still showed mild to moderate multifocal</li> </ul> | Antioxidant, anti-inflammation, nephroprotective | Not reported             |

|                            |                           |                                                                                                    |                    |                                                                      |                                      |                                                                                                                                                                                                                                                                                                                                                                            |                                                     |              |
|----------------------------|---------------------------|----------------------------------------------------------------------------------------------------|--------------------|----------------------------------------------------------------------|--------------------------------------|----------------------------------------------------------------------------------------------------------------------------------------------------------------------------------------------------------------------------------------------------------------------------------------------------------------------------------------------------------------------------|-----------------------------------------------------|--------------|
|                            |                           |                                                                                                    |                    |                                                                      |                                      | degeneration and renal tubular epithelial cells necrosis.                                                                                                                                                                                                                                                                                                                  |                                                     |              |
| El Rabey, 2017 [40]        | MO seed powder            | Milled MO seeds were mixed to the 2% cholesterol diet powder.                                      | Not reported       | Basal fat-rich diet-induced hypercholesterolemia in male albino rats | 50 mg/kg BW for 8 weeks              | <ul style="list-style-type: none"> <li>- ↓ TC, TG, LDL, VLDL, LDH, CK-MB, ALT, AST, ALP, GGT activities.</li> <li>- ↑ HDL,</li> <li>- ↑ water consumption.</li> <li>- Histopathological of the liver showed slight congestion of hepatic sinusoids and nearly restored normal appearance.</li> </ul>                                                                       | Lipid metabolism, hepatoprotective                  | Not reported |
| Ezzat SM et al., 2020 [41] | MO leaves ethanol extract | Powdered MO leaves were macerated using 70% ethanol and evaporated to yield dried ethanol extract. | 10%                | High-fat diet-induced obesity in rats                                | 200 and 400 mg/kg BW p.o for 1 month | <ul style="list-style-type: none"> <li>- ↓ body weight, adiposity index, glucose, insulin, HOMA-IR, TC, TG, and LDL.</li> <li>- ↑ Increased R-QUICKI, HD.</li> <li>- ↓ leptin and increased adiponectin, omentin, and GLUT-4 levels of the adipose tissue.</li> <li>- Suppressed FAS and HMG-CoA reductase</li> <li>- ↑ mRNA MC4R and PPAR-<math>\alpha</math>.</li> </ul> | Lipid metabolism, antiobesity                       | Not reported |
| Fahey JW et al., 2019 [42] | MO leaves aqueous tea     | Powdered MO leaves were extracted in deionized water.                                              | Not clearly stated | LPS-induced inflammation in RAW264.7 cells.                          |                                      | The doses required to produce a median effect of NO suppression were: moringin, 0.19 $\mu$ M; cold moringa tea, 0.17 $\mu$ M and hot moringa tea >100 $\mu$ M                                                                                                                                                                                                              | Anti-inflammation                                   | Not reported |
| Gao X et al., 2017 [43]    | MO leaves aqueous extract | Ultra-micro powder of MO leaves were boiled in ultrapure                                           | 31.5%              | Healthy male                                                         | 750 mg/kg BW p.o daily for 4 weeks   | <ul style="list-style-type: none"> <li>- ↓ liver TG content.</li> <li>- Higher levels of bacterial LPS were found in serum.</li> </ul>                                                                                                                                                                                                                                     | Anti-inflammation, lipid metabolism, gut microbiome | Not reported |



|                            |                                      |                                                                                      |              |                                                           |                                      |                                                                                                                                                                                                                                                                                                                                                                                                                                                                                                                                                                             |                                  |              |
|----------------------------|--------------------------------------|--------------------------------------------------------------------------------------|--------------|-----------------------------------------------------------|--------------------------------------|-----------------------------------------------------------------------------------------------------------------------------------------------------------------------------------------------------------------------------------------------------------------------------------------------------------------------------------------------------------------------------------------------------------------------------------------------------------------------------------------------------------------------------------------------------------------------------|----------------------------------|--------------|
|                            |                                      | water, followed by centrifugation. The supernatant was dried in vacuum freeze-dryer. |              | C57Bl/6 J mice                                            |                                      | <ul style="list-style-type: none"> <li>- Enhanced mRNA expression levels of TNF-<math>\alpha</math>, IL-1<math>\beta</math>, and IL-6, MCP-1 in the colon.</li> <li>- Upregulation of Reg3g, Pla2g2, Defa in the colon.</li> <li>- Downregulation of Lyz1, Muc2, and occludin.</li> <li>- <math>\downarrow</math> ileum mRNA IL-1<math>\beta</math>, IL-6, increased MCP-1.</li> <li>- Moderate dosage of extract triggered an inflammatory response</li> <li>- Disruption of intestinal homeostasis.</li> <li>- Dominant gut microbial composition was changed.</li> </ul> |                                  |              |
| Ghasi S et al., 2000 [44]  | MO leaves crude extract              | Grounded MO leaves were decocted in distilled water for obtaining crude extract.     | Not reported | High-fat diet in male Wistar rats                         | 1 mg/g BW p.o once daily for 30 days | <ul style="list-style-type: none"> <li>- <math>\downarrow</math> cholesterol</li> <li>- <math>\uparrow</math> albumin</li> <li>- No effect on total protein serum.</li> </ul>                                                                                                                                                                                                                                                                                                                                                                                               | Lipid metabolism                 | Not reported |
| Gouda AS et al., 2018 [45] | MO extract                           | Purchased from Egyptian National Research Center (1 g/mL aqueous preparations).      | Not reported | Aluminum phosphide-induced acute cardiac toxicity in rats | 100 mg /kgBW p.o                     | <ul style="list-style-type: none"> <li>- Cardiac muscle showed congestion of intermuscular capillaries with mild disruption and edema of muscular bundles. The extract showed a protective effect.</li> <li>- <math>\uparrow</math>CAT, GR</li> <li>- <math>\downarrow</math> MDA, SOD.</li> </ul>                                                                                                                                                                                                                                                                          | Antioxidant, cardioprotective    | Not reported |
| Gupta R et al., 2012 [46]  | Methanol extracts of MO pods (MOMtE) | Dried powdered pods of MO were percolated with 100% methanol.                        | 0.85%        | Streptozotocin-induced diabetes in albino rats.           | 150, 300 mg/kg BW for 21 days        | <ul style="list-style-type: none"> <li>- <math>\downarrow</math> serum glucose, NO, TBARS, MDA.</li> </ul>                                                                                                                                                                                                                                                                                                                                                                                                                                                                  | Antioxidant, glucose metabolism. | Not reported |

|                            |                                       |                                                                                                                                                                                                                                                    |              |                                                |                                              |                                                                                                                                                                             |                                   |               |
|----------------------------|---------------------------------------|----------------------------------------------------------------------------------------------------------------------------------------------------------------------------------------------------------------------------------------------------|--------------|------------------------------------------------|----------------------------------------------|-----------------------------------------------------------------------------------------------------------------------------------------------------------------------------|-----------------------------------|---------------|
|                            |                                       |                                                                                                                                                                                                                                                    |              |                                                |                                              | <ul style="list-style-type: none"> <li>- ↑ serum insulin, protein levels, SOD, GSH, CAT.</li> <li>- Reverse the damage of histoarchitectural to the islet cells.</li> </ul> |                                   |               |
| Huang L et al., 2020 [47]  | Isothiocyanates isolated from MO seed | MO peeled seeds were extracted with 30% and 90% methanol for 3 times. It is followed by water-ethyl acetate extraction. The water extract was further fractionated using water and methanol in different concentrations (10%, 30%, 50%, 70%, 90%). | 18.5%        | 3T3-L1 adipocytes                              | 10, 20, 30, 60 μM                            | Inhibit intracellular lipid accumulation                                                                                                                                    | Lipid metabolism                  | Not cytotoxic |
| Huang Q et al., 2020 [48]  | MO seeds ethanol extract              | MO seed was extracted with water then evaporated, lyophilized and further extraction using 90% ethanol.                                                                                                                                            | 4.13%        | HepG2-insulin resistance model                 | 10 ng/mL, 100 ng/mL, 1 μg/mL, 10 μg/mL       | <ul style="list-style-type: none"> <li>- ↑ glucose uptake by cells.</li> <li>- Suppressed SRC, PTPN1, caspase-3 expression.</li> </ul>                                      | Glucose metabolism, antiapoptotic | Not reported  |
| Irfan HM et al., 2016 [49] | MO leaves ethanol extract             | Powdered MO leaves were extracted with 95% ethanol by maceration.                                                                                                                                                                                  | Not reported | Streptozotocin-induced diabetes male S.D. rats | 125, 250, 500, 1000 mg/kg BW p.o for 14 days | ↓ fasting blood glucose concentration, body weight, cholesterol, TG.                                                                                                        | Glucose and lipid homeostasis     | Not reported  |

|                                  |                                         |                                                                                                                                                                                                                             |              |                                                                        |                                                            |                                                                                                                                                                                                                                                                                                                                                                                                                                                                        |                                                    |                                                                                         |
|----------------------------------|-----------------------------------------|-----------------------------------------------------------------------------------------------------------------------------------------------------------------------------------------------------------------------------|--------------|------------------------------------------------------------------------|------------------------------------------------------------|------------------------------------------------------------------------------------------------------------------------------------------------------------------------------------------------------------------------------------------------------------------------------------------------------------------------------------------------------------------------------------------------------------------------------------------------------------------------|----------------------------------------------------|-----------------------------------------------------------------------------------------|
| Jaiswal D et al., 2009 [50]      | MO leaves aqueous extract               | Crushed MO leaves were extracted hot distilled water.                                                                                                                                                                       | 11.7%        | Streptozotocin-induced diabetes male albino Wistar rats                | 100, 200, 300 mg/kg BW p.o for 21 days                     | <ul style="list-style-type: none"> <li>- ↓ fasting blood glucose, postprandial glucose, urine glucose, and protein.</li> <li>- ↑ Hb and total protein.</li> </ul>                                                                                                                                                                                                                                                                                                      | Glucose metabolism                                 | Acute toxicity test: not toxic up to 15 x effective dose. Normal behavior and no death. |
| Jaiswal D et al., 2013 [51]      | MO leaves aqueous extract               | Fresh leaves macerated in distilled water.                                                                                                                                                                                  | 10.5%        | Streptozotocin-induced diabetes male albino Wistar rats                | 200 mg/kg BW p.o daily for 21 days                         | <ul style="list-style-type: none"> <li>- ↑ SOD, CAT, GST.</li> <li>- ↓ MDA</li> </ul>                                                                                                                                                                                                                                                                                                                                                                                  | Antioxidant                                        | Not reported                                                                            |
| Jaja-Chimedza A et al, 2017 [52] | Isothiocyanate-enriched MO seed extract | MO seed extract was prepared by incubating ground seeds in water, then ethanol, followed by filtration, drying and purification.                                                                                            | 12.6 - 13.2% | RAW 264.7 cells<br><br>Carrageenan-induced paw edema in male S.D. rats | 0.05, 0.1, 0.5, 1, 5 and 10 μM<br><br>250 and 500 mg/kg BW | <ul style="list-style-type: none"> <li>- ↓ NO production, iNOS, IL-1β and IL-6 expression.</li> <li>- Upregulation of all Nrf2 target genes (NQO1, HO1, GSTP1).</li> <li>- Inhibition of paw edema.</li> </ul>                                                                                                                                                                                                                                                         | Anti-inflammation                                  | No significant effect on cell viability.                                                |
| Joung H et al, 2017 [53]         | MO fermented extract                    | Powder of MO leaves was mixed in distilled water in three different mixtures. Those were inoculated with 2.5% culture media of each strain and incubated 37°C for 24 h. Samples were centrifuge at 4 °C, 12000 rpm, 15 min. | Not reported | High-fat diet-induced obesity in male C57BL/6J mice                    | 250 mg/kg BW p.o daily for 10 weeks                        | <ul style="list-style-type: none"> <li>- Improved glucose tolerance test.</li> <li>- ↓ liver weight, hepatic lipid accumulation.</li> <li>- Downregulation of lipogenic genes (ACC, FAS, C/ENPα, SREBP1c, LPL), lipid oxidative genes (CD36, ACOX1, CPT1 (NFM), HSL), and oxidative stress genes (UCP2 and UCP3).</li> <li>- Upregulation of lipolysis genes (ATGL, HSL).</li> <li>- Reduced expression of genes related to ER stress (BiP, PDI, and CHOP).</li> </ul> | Glucose metabolism, antioxidant, anti-inflammation | Not reported                                                                            |

|                                 |                                      |                                                                         |                                              |                                                         |                               |                                                                                                                                                                                                                                                                                                                                                                                        |                                                   |                                                                           |
|---------------------------------|--------------------------------------|-------------------------------------------------------------------------|----------------------------------------------|---------------------------------------------------------|-------------------------------|----------------------------------------------------------------------------------------------------------------------------------------------------------------------------------------------------------------------------------------------------------------------------------------------------------------------------------------------------------------------------------------|---------------------------------------------------|---------------------------------------------------------------------------|
|                                 |                                      |                                                                         |                                              |                                                         |                               | <ul style="list-style-type: none"> <li>- ↓ mRNA proinflammatory cytokines (TNF<math>\alpha</math>, IL-6, and IL-12).</li> <li>- Unchanged Akt phosphorylation level.</li> </ul>                                                                                                                                                                                                        |                                                   |                                                                           |
| Khalil SR et al., 2020 [54]     | MO leaves ethanol extract            | Powdered MO leaves was macerated in absolute ethanol                    | Not reported                                 | Tilmicosin-induced cardiac injury in male S.D. rats     | 400 and 800 mg/kg BW p.o      | <ul style="list-style-type: none"> <li>- ↓ mortality rate.</li> <li>- ↓ CK-MB, CPK, troponin levels.</li> <li>- ↓ MDA, PC, and 8-OHdG levels.</li> <li>- ↑ CAT, SOD, GSH, TAC.</li> <li>- Up-regulation of Bcl-2</li> <li>- Downregulation of Bax, caspase-3, Apaf-1, AIF, P53.</li> <li>- Heart sections revealed partial restoration.</li> </ul>                                     | Antioxidant, antiapoptotic, cardioprotective      | Not reported                                                              |
| Kumar Gupta S et al., 2013 [55] | MO leaves aqueous extract            | Dried leaves were extracted using water at 60-70°C.                     | Not reported                                 | Streptozotocin-induced diabetes male albino Wistar rats | 100 mg/kg BW p.o for 24 weeks | <ul style="list-style-type: none"> <li>- ↓ blood glucose levels, HbA1c.</li> <li>- ↓ retinal dilated vessels and</li> <li>- Improvement of the thickened basement membrane.</li> <li>- ↓ clinical grading of fluorescein angiograms.</li> <li>- ↓ retinal TNF-<math>\alpha</math>, IL-1<math>\beta</math>, VEGF, PKC-<math>\beta</math>.</li> <li>- ↑ retinal GSH, SOD, CAT</li> </ul> | Antioxidant, anti-inflammation, Vasculoprotective | Not reported                                                              |
| Li C et al., 2020 [56]          | Novel polysaccharides from MO leaves | (1) Hot water extraction followed by ethanol precipitation (crude MOPL) | Crude MOPL: 6.84%; further purification from | RAW 246.7 cells                                         | 31.3–500 $\mu$ g/mL           | <ul style="list-style-type: none"> <li>- Stimulation of pinocytosis, ROS, NO, IL-6 and TNF-<math>\alpha</math></li> <li>- ↑ mRNA of NO, IL-6 and TNF-<math>\alpha</math>.</li> </ul>                                                                                                                                                                                                   | Immunomodulation                                  | Cytotoxicity test: Doses 31.3–500 $\mu$ g/mL promoted cell proliferation. |

|                          |                                           |                                                                                                                                                                                                                                                                        |              |                                              |                                                                      |                                                                                                                                                                                                                                                                                                                                                                                                                                                                                      |                                               |                                            |
|--------------------------|-------------------------------------------|------------------------------------------------------------------------------------------------------------------------------------------------------------------------------------------------------------------------------------------------------------------------|--------------|----------------------------------------------|----------------------------------------------------------------------|--------------------------------------------------------------------------------------------------------------------------------------------------------------------------------------------------------------------------------------------------------------------------------------------------------------------------------------------------------------------------------------------------------------------------------------------------------------------------------------|-----------------------------------------------|--------------------------------------------|
|                          |                                           | (2) Further purification using DEAE-Sepharose fast-flow ion-exchange                                                                                                                                                                                                   | MOPL: 15.4%  |                                              |                                                                      |                                                                                                                                                                                                                                                                                                                                                                                                                                                                                      |                                               | Not toxic to cells.                        |
| Li YJ et al, 2020 [57]   | MO seed                                   | Not reported                                                                                                                                                                                                                                                           | Not reported | Myocardial infarction (MI) male C57/BL6 mice | 600 mg or 900 mg in food, daily for 2 weeks pre- and post-MI surgery | <ul style="list-style-type: none"> <li>- ↑ survival rate.</li> <li>- ↑ LVEF and LVFS) in ECG analysis.</li> <li>- ↓ heart volume, infarct areas, the volume of infarcted heart, and fibrotic scarring.</li> <li>- The thicker anterior wall of the left ventricle chamber.</li> <li>- Prevent cardiac remodeling.</li> <li>- ↓ TUNEL positive cells, Bax, cytochrome C</li> <li>- ↑ Bcl-2, which indicates reduced myocardial apoptosis.</li> <li>- ↓ gp91phox, and iNOS.</li> </ul> | Antioxidant, antiapoptotic, cardio-protective | Not reported                               |
| Liao PC et al, 2018 [58] | β-Sitosterol isolated from MO woody stems | Woody stems of MO were extracted using ethanol followed with partitioned in <i>n</i> -hexane/water (1/1 v/v). The <i>n</i> -hexane fraction was applied to a silica gel column and then eluted with acetone/ <i>n</i> -hexane (1:1 v/v), followed with purification in | 5.9%         | HaCaT and J774A.1 cells                      | 7.5–60 μM                                                            | <ul style="list-style-type: none"> <li>- ↓ IL-1β, IL-6, IL-8, TNF-α secretion.</li> <li>- Inhibition of NLRP3, expression, ROS production, caspase-1 activation.</li> <li>- Partially inhibited NF-κB in macrophages.</li> </ul>                                                                                                                                                                                                                                                     | Anti-inflammation                             | Cytotoxicity test: no toxicity up to 60 μM |

|                                 |                                        |                                                                                                                                         |                               |                                                                        |                                                                                                                                      |                                                                                                                                                                                                                                                                                                                                                                                                                                         |                               |                                                                                                                                  |
|---------------------------------|----------------------------------------|-----------------------------------------------------------------------------------------------------------------------------------------|-------------------------------|------------------------------------------------------------------------|--------------------------------------------------------------------------------------------------------------------------------------|-----------------------------------------------------------------------------------------------------------------------------------------------------------------------------------------------------------------------------------------------------------------------------------------------------------------------------------------------------------------------------------------------------------------------------------------|-------------------------------|----------------------------------------------------------------------------------------------------------------------------------|
|                                 |                                        | HPLC to obtain stigmasterol and $\beta$ -Sitosterol                                                                                     |                               |                                                                        |                                                                                                                                      |                                                                                                                                                                                                                                                                                                                                                                                                                                         |                               |                                                                                                                                  |
| López M et al, 2018 [59]        | MO leaf powder                         | Not reported                                                                                                                            | Not reported                  | High-fat and fructose diet-induced metabolic syndrome male Wistar rats | Preventive: 700 mg/kg BW p.o daily for 3 weeks before induction<br><br>Treatment: 700 mg/kg BW p.o daily for 3 weeks after induction | <ul style="list-style-type: none"> <li>- ↓ fasting glucose levels.</li> <li>- There are no significant differences in ITT, OGTT, TC, TG, SBP, DBP, or abdominal circumference.</li> <li>- ↓ glucose tolerance, TG, and abdominal circumference.</li> <li>- No significant differences in the ITT.</li> </ul>                                                                                                                            | Glucose and lipid metabolism  | Not reported                                                                                                                     |
| Luetrogo on T et al., 2020 [60] | MO ethyl acetate extract and fractions | Dried MO powder was extracted by hexane and ethyl acetate (EtOAc) individually. Crude EtOAc were fractionated in column chromatography. | 2.2% (hexane); 6.4% (ethanol) | Human MDM                                                              | Ethyl acetate extract: 56.98 $\mu$ g/mL<br>fraction 6: 144.66 $\mu$ g/mL<br>fraction 12: 162.08 $\mu$ g/mL                           | <ul style="list-style-type: none"> <li>- Downregulation of mRNA IL1, IL-6, TNF-<math>\alpha</math>, PTGS2, NF-<math>\kappa</math>B (P50), and RelA.</li> <li>- Inhibition of IL-6 and TNF-<math>\alpha</math> production.</li> <li>- Inhibition of NF-<math>\kappa</math>B (p65) translocation into the nucleus leads to the reduction of p65, phospho-I<math>\kappa</math>B-<math>\alpha</math>, and COX-2 proteins levels.</li> </ul> | Anti-inflammation             | Cytotoxicity test: LC50 of ethyl acetate extract, fraction 6, fraction 12 were 521.19, 693.42, 1119.43 $\mu$ g/mL, respectively. |
| Mabrouk i L et al., 2020 [61]   | methanol extract of MO leaves          | Fine powdered MO leaves were extracted with methanol.                                                                                   | Not clearly stated            | in vivo: Rats (high-fat diet-induced obesity)                          | 200 mg/kg/bw and 400 mg/kg/bw for 12 weeks                                                                                           | <ul style="list-style-type: none"> <li>- ↓ body weight gain</li> <li>- ↓TC, ↓ TG, ↓ HDL-C</li> <li>- ↑ CK-MB</li> <li>- ↑ CAT, GPx, SOD</li> <li>- ↓ MDA</li> </ul>                                                                                                                                                                                                                                                                     | Lipid metabolism, antioxidant | not reported                                                                                                                     |

|                               |                                      |                                                                                                                                                                                       |              |                                                                                                                          |                                              |                                                                                                                                                                                                                                                                                                                                                                                             |                                                |              |
|-------------------------------|--------------------------------------|---------------------------------------------------------------------------------------------------------------------------------------------------------------------------------------|--------------|--------------------------------------------------------------------------------------------------------------------------|----------------------------------------------|---------------------------------------------------------------------------------------------------------------------------------------------------------------------------------------------------------------------------------------------------------------------------------------------------------------------------------------------------------------------------------------------|------------------------------------------------|--------------|
| Madkhali HA et al., 2019 [62] | methanol extract of MO leaves (MEMO) | Powdered MO leaves was extracted with methanol using a Soxhlet apparatus                                                                                                              | Not reported | in vivo:<br>Rats (high-fat diet-induced dyslipidemia and vascular endothelium dysfunction)                               | 200 and 400 mg/kg/day for 3 weeks            | <ul style="list-style-type: none"> <li>- ↓ liver weight</li> <li>- ↓ BMI, ↓ waist, ↓ Lee-index</li> <li>- ↓TC, ↓TG, ↓VLDL, ↓LDL, ↑HDL-C</li> <li>- reversing endothelial dysfunction (↓ endothelium relaxation)</li> <li>- improvement and photomicrographs architecture of aorta</li> </ul>                                                                                                | Lipid metabolism, vasculoprotective            | not reported |
| Mapfumo M et al., 2019 [63]   | Crude hydroethanolic MO seed extract | Dried and dehulled MO seeds were grounded. It is extracted with 70% ethanol to obtain seed extract.                                                                                   | Not reported | in vivo:<br>Rats (high fructose diet for induced metabolic syndrome)                                                     | 50 and 500 mg/kg body mass for 12 weeks      | <ul style="list-style-type: none"> <li>- ↓ glucose tolerance (more pronounced in male than female rats)</li> <li>- ↓ fasting glucose, insulin, and HOMA-IR (more favorable in female than male rats)</li> <li>- ↓ TG</li> <li>- no change in total cholesterol</li> </ul>                                                                                                                   | Glucose and lipid metabolism                   | not reported |
| Mehta K et al., 2003 [64]     | MO fruit powder                      | The outer skin, pulp, and seed of MO fruits were collected and dried at 60 °C separately and then sifted.                                                                             | 3 - 7%       | in vivo:<br>Rabbits (hypercholesterolemia diet)                                                                          | 200 mg/kg p.o for 120 days in banana pulp    | <ul style="list-style-type: none"> <li>- ↓ TC, ↓ phospholipid, ↓ TG, ↓ VLDL, ↓LDL-C, and ↑ HDL ratio (HDL/HDL-TC)</li> <li>- ↓HDL-C</li> <li>- ↓ lipid profile in liver, heart, and aorta, but not in heart</li> </ul>                                                                                                                                                                      | Lipid metabolism                               | not reported |
| Muhammad AA et al., 2016 [65] | MO aqueous fraction                  | The dried and powdered leaves were macerated with 80% methanol, then was separated in hexane and dichloromethane, as well as butanol and ethyl-acetate. and water:methanol (1:3 v/v). | Not reported | <i>in vitro</i> :<br>Pathogenic bacteria consisting of <i>P. aeruginosa</i> strain PAO1, methicillin-resistant <i>S.</i> | 0.5%, 1%, and 2% w/w in ointment formulation | <p><i>in vitro</i></p> <ul style="list-style-type: none"> <li>- inhibited growth <i>S. aureus</i>: 3.125 µg/mL and <i>P. aeruginosa</i>: 6.25 µg/mL against <i>E. coli</i></li> <li>- The MIC for tetracycline standard antibiotic: 3.125 µg/mL against <i>E. coli</i> and 6.25 µg/mL against <i>S. aureus</i> and <i>P. aeruginosa</i>.</li> </ul> <p><i>in vivo</i>:<br/>↓ wound size</p> | Antiinflammation, wound healing, antibacterial | not reported |

|                                   |                                      |                                                    |                 |                                                                                                                                                                        |                                                  |                                                                                                                                                                                                                                                                                                                                                                                                                                                                                                                 |                                  |              |
|-----------------------------------|--------------------------------------|----------------------------------------------------|-----------------|------------------------------------------------------------------------------------------------------------------------------------------------------------------------|--------------------------------------------------|-----------------------------------------------------------------------------------------------------------------------------------------------------------------------------------------------------------------------------------------------------------------------------------------------------------------------------------------------------------------------------------------------------------------------------------------------------------------------------------------------------------------|----------------------------------|--------------|
|                                   |                                      |                                                    |                 | <i>aureus</i> , and<br><i>E. coli</i><br><br><i>in vivo</i> :<br>Rats<br>(streptozotocin and<br>nicotinamide-induced<br>diabetic,<br>followed by<br>wound<br>excision) |                                                  | <ul style="list-style-type: none"> <li>↑ wound contraction</li> <li>↑ tissue regeneration</li> <li>↓ inflammatory mediators: TNF-<math>\alpha</math>, IL-1<math>\beta</math>, IL-6, iNOS, and COX-2</li> <li>↑ VEGF</li> </ul>                                                                                                                                                                                                                                                                                  |                                  |              |
| Murillo<br>G et al.,<br>2017 [66] | MO leaves<br>powder                  | Not reported                                       | Not<br>reported | In vivo:<br>guinea pigs<br>(hypercholesterolemic<br>diet with<br>0.25%<br>cholesterol)                                                                                 | 3 or 4.5 g/day<br>a daily intake<br>for 6 weeks  | <ul style="list-style-type: none"> <li>- no changes in plasma lipids,<br/>glucose, or insulin</li> <li>- ↑ the activity of lecithin<br/>cholesterol acyltransferase</li> </ul>                                                                                                                                                                                                                                                                                                                                  | Lipid metabolism                 | not reported |
| Nafiu<br>AO,<br>2019 [67]         | Ethanollic<br>extract of<br>MO seeds | MO seeds were<br>extracted in ethanol<br>for 24 h. | Not<br>reported | <i>in vivo</i> :<br>Rats<br>(gentamicin-<br>induced<br>nephrotoxicity)                                                                                                 | 100, 200 and<br>400 mg/kg/day<br>p.o for 28 days | <ul style="list-style-type: none"> <li>- ↓ urine volume</li> <li>- ↑ body weight</li> <li>- ↓ urea in urine</li> <li>- ↓ creatinine plasma and ↑<br/>creatinine urine</li> <li>- ↑ creatinine clearance</li> <li>- restoration electrolytes</li> <li>- ↑ SOD and ↓ MDA</li> <li>- improvement in the<br/>histoarchitecture of the kidney<br/>with mild distortion, few abortive<br/>glomeruli, and mild vascular<br/>congestion (400 mg/kg treatment<br/>seems to have fared better than<br/>others)</li> </ul> | Antioxidant,<br>nephroprotective | not reported |



|                              |                                                               |                                                                                                                                  |              |                                                                               |                                                                                  |                                                                                                                                                                       |                               |                                                                  |
|------------------------------|---------------------------------------------------------------|----------------------------------------------------------------------------------------------------------------------------------|--------------|-------------------------------------------------------------------------------|----------------------------------------------------------------------------------|-----------------------------------------------------------------------------------------------------------------------------------------------------------------------|-------------------------------|------------------------------------------------------------------|
| Nandave et al, 2007 [68]     | Lyophilized hydroalcoholic extract of <i>Moringa oleifera</i> | MO leaves were macerated with (methanol: water, 50:50 v/v) and evaporated to yield the extract.                                  | 34.2%        | in vivo:<br>Rats (isoproterenol-induced) cardiotoxicity model                 | 200 mg/kgBW for 1 months                                                         | - improvement hemodynamic parameters<br>- ↑ SOD, CAT, GSH-Px, LDH, and CK-MB<br>- prevention of the deleterious histopathological and ultrastructural perturbations   | Antioxidant, cardioprotective | not reported                                                     |
| Ndong et al, 2007 [69]       | MO leaves powder                                              | Not reported                                                                                                                     | Not reported | in vivo:<br>Rats (iron-deficient diet)                                        | 0,5-1% MO in a diet for 4 weeks                                                  | - ↓ Hb<br>- ↑ liver weight<br>- ↓ liver iron<br>- ↓ liver copper<br>- ↓ TC, TG, and phospholipids                                                                     | Lipid metabolism              | not reported                                                     |
| Ofem, O.E et al., 2015 [70]  | Aqueous leaves of MO                                          | Grounded MO leaves were extracted with distilled water at 100 °C for 9 hr using Soxhlet apparatus.                               | 31%          | in vivo:<br>Rats (high salt diet)                                             | 600 mg /kgBW for 6 weeks                                                         | Resolved hematology parameter:<br>↑WBC, RBC, platelet counts, PCV, lymphocytes, P-LCR, MPV, and PDW                                                                   | Hematology                    | not reported                                                     |
| Olayaki et al, 2015 [71]     | Methanolic extracts of MO (MOLE)                              | Powdered MO leaves were soaked with methanol using a cold-extraction method.                                                     | Not reported | in vivo:<br>Rats (alloxan-induced diabetes)                                   | 300 and 600 mg/kg body weight p.o for 6 weeks                                    | - ↓ blood glucose<br>- ↑ glucose tolerance<br>- ↑ serum insulin<br>- ↓ serum cholesterol, TG, LDL-C, ↑ HDL<br>- ↑ glycogen synthase activities and glycogen contents. | Glucose and lipid metabolism  | not reported                                                     |
| Oldoni TLC et al., 2021 [72] | Hydroalcoholic subfraction extract leaves of MO               | Grounded MO leaves were extracted with ethanol water (80:20) for 48 hr at room temperature (HE). The HE was fractioned by solid- | Not reported | <i>in vitro</i> :<br>● Folin-Ciocalteu assay<br>● Ferric reducing antioxidant | in vitro:<br>25 - 1000 µg/mL hydroalcoholic extract<br><br>in vivo:<br>500 mg/kg | Fr-EtOAc :<br>- ↓ FRAP, DPPH and ABTS, and ORAC assay<br>- isoquercitrin, astragalins and 3-O-caffeoylquinic acid were obtained.<br><br>In vivo:<br>- ↓ blood glucose | Antioxidant                   | no observed cytotoxicity effect (concentration up to 1000 mg/mL) |

|                                 |                                        |                                                                                                                                                                                                                                |              |                                                                                                                                                                                                               |                              |                                                                                                                                                                                                                                                           |                                                 |                                 |
|---------------------------------|----------------------------------------|--------------------------------------------------------------------------------------------------------------------------------------------------------------------------------------------------------------------------------|--------------|---------------------------------------------------------------------------------------------------------------------------------------------------------------------------------------------------------------|------------------------------|-----------------------------------------------------------------------------------------------------------------------------------------------------------------------------------------------------------------------------------------------------------|-------------------------------------------------|---------------------------------|
|                                 |                                        | liquid extraction using hexane, dichloromethane, ethyl acetate, acetone, ethanol and ethanol:water (50:50, v/v). The active Fr-EtOAc was purified in an open Column Chromatography and followed by TLC to obtain subfractions. |              | <p>power (FRAP) assay</p> <ul style="list-style-type: none"> <li>● DPPH assay</li> <li>● ABTS assay</li> <li>● cell viability using PBMCs</li> </ul> <p><i>in vivo:</i><br/>Rats (streptozotocin-induced)</p> | hydroalcoholic extract       | <ul style="list-style-type: none"> <li>- ↑ CAT activity in liver and kidney</li> <li>- ↓ GST in liver and kidney</li> <li>- ↓ non-protein thiol groups and thiobarbituric acid reactive substances in liver and kidney</li> </ul>                         |                                                 |                                 |
| Omodani si EI et al., 2017 [73] | Methanolic extract of MO leaves        | Not clearly stated                                                                                                                                                                                                             | Not reported | <i>in vivo:</i><br>Rats (streptozotocin-induced)                                                                                                                                                              | 250 mg/kg BW p.o for 6 weeks | <ul style="list-style-type: none"> <li>- ↑ renal weight</li> <li>- ↓ plasma glucose</li> <li>- ↓ MDA, ↑ SOD, ↑CAT, and ↑ GSH in renal</li> <li>- ↓ TNF-<math>\alpha</math> and ↓ IL-6</li> <li>- protective effect on histological examination</li> </ul> | Antioxidant                                     | not reported                    |
| Ouédraogo M et al., 2011 [74]   | Aqueous-ethanolic extract of MO leaves | The powdered MO leaves were extracted with ethanol/water (80/20) for 48 h at room temperature.                                                                                                                                 | 4.8%         | <i>in vivo:</i><br>Rabbit (nephrotoxicity induced by gentamicin)                                                                                                                                              | 150 and 300 mg/kgBW          | <ul style="list-style-type: none"> <li>- ↓ serum urea and creatinine</li> <li>- ↓ lipid peroxidation</li> <li>- reparative tendencies from histological examination</li> </ul>                                                                            | Antioxidant, lipid metabolism, nephroprotective | no toxicity signs were observed |
| Panda S, 2013 [75]              | N,a-L-rhamnopyranosyl vincosamid       | 70% ethanol of powdered leaves extract                                                                                                                                                                                         | Not reported | <i>in vivo:</i><br>Rats (isoproterenol-induced)                                                                                                                                                               | 40 mg/kgBW for 7 days        | <ul style="list-style-type: none"> <li>- ↓ serum LDH, CK-MB, troponin T, and glutamate pyruvate transaminase</li> <li>- ↓ cardiac Troponin T and MDA</li> </ul>                                                                                           | Antioxidant, cardioprotective                   | not reported                    |

|                            |                                         |                                                                                                                                                                                                                                                                           |                                                                             |                                                            |                                                 |                                                                                                                                           |                                |                                                             |
|----------------------------|-----------------------------------------|---------------------------------------------------------------------------------------------------------------------------------------------------------------------------------------------------------------------------------------------------------------------------|-----------------------------------------------------------------------------|------------------------------------------------------------|-------------------------------------------------|-------------------------------------------------------------------------------------------------------------------------------------------|--------------------------------|-------------------------------------------------------------|
|                            | e (VR) isolated from MO leaves          |                                                                                                                                                                                                                                                                           |                                                                             | cardiotoxicity model)                                      |                                                 | - ↓ myocardial necrosis                                                                                                                   |                                |                                                             |
| Panda, 2015 [76]           | MO polyphenolic fraction (MOPF)         | Powdered MO leaves was extracted with 70% ethanol. The crude extract was fractionated using n-hexane, dichloromethane, and n-butanol.                                                                                                                                     | Crude extract: 20.1%; n-hexane: 1.1%, dichloromethane 0.9%; n-butanol: 1.9% | in vivo: Rats (isoproterenol-induced cardiotoxicity model) | 50, 100 and 150 mg/kg/day for 28 days           | - ↑ SOD, ↑ Catalase, ↑ GSH-Px, ↑ GSH (MOPF100)<br>- ↓ cardiac infarcted area (MOPF100)<br>- ↓LDH, CK-MB, and cardiac Troponin T (MOPF100) | Antioxidant, cardioprotective  | not reported                                                |
| Paula PC et al., 2017 [77] | Isolated protein from MO leaves: Mo-LPI | Powdered MO leaves was extracted in Tris-HCl buffer containing NaCl, polyvinylpyrrolidone (PVPP), phenyl-methylsulfonyl fluoride (PMSF) and ethylenediaminetetraacetic acid (EDTA), (1:5, w/v), under agitation at 4 °C for 30 min. The crude extract was precipitated at | 5%                                                                          | in vivo: Mice (alloxan-induced diabetes)                   | 500 mg/kgBW, single-dose intraperitoneal (i.p.) | - ↓ blood glucose<br>- ↓ MDA and ↑ catalase activity                                                                                      | Antioxidant glucose metabolism | Mo-LPI (2500 mg/kgBW) did not cause acute toxicity to mice. |

|                                       |                                                   |                                                                               |                          |                                                              |                                             |                                                                                                                                                                                                                                                                                                                                                                                                                                                                                                           |                                                 |              |
|---------------------------------------|---------------------------------------------------|-------------------------------------------------------------------------------|--------------------------|--------------------------------------------------------------|---------------------------------------------|-----------------------------------------------------------------------------------------------------------------------------------------------------------------------------------------------------------------------------------------------------------------------------------------------------------------------------------------------------------------------------------------------------------------------------------------------------------------------------------------------------------|-------------------------------------------------|--------------|
|                                       |                                                   | 90% saturation with ammonium sulphate.                                        |                          |                                                              |                                             |                                                                                                                                                                                                                                                                                                                                                                                                                                                                                                           |                                                 |              |
| Rajanand h, M.G, et al., 2012 [78]    | Hydroalcoholic extract of Moringa oleifera (HEMO) | Powdered MO leaves were extracted with ethanol using cold maceration methods. | 0.09% of Beta-sitosterol | in vivo: Rats (atherogenic diet for inducing hyperlipidemia) | 200 mg/kg p.o. for 28 days                  | <ul style="list-style-type: none"> <li>- ↓ body weight</li> <li>- ↓ TC, TG, LDL-C, VLDL, and ↑ HDL-C</li> <li>- ↑ SOD, ↑ CAT, and ↓MDA</li> <li>- ↓ TNF-<math>\alpha</math> and ↓ IL-1<math>\alpha</math></li> </ul>                                                                                                                                                                                                                                                                                      | Antioxidant anti-inflammatory, lipid metabolism | Not reported |
| Randria mboavonjy JI et al, 2016 [79] | MO seed powder                                    | Not reported                                                                  | Not reported             | in vivo: Wistar Rats induced by spontaneous hypertensive     | 750 mg/d each rat in their food for 8 weeks | <ul style="list-style-type: none"> <li>- did not modify BP</li> <li>- ↓ nocturnal heart rate</li> <li>- ↓ isovolumetric relaxation time and deceleration time of the E wave</li> <li>- ↑ ejection volume and cardiac output</li> <li>- ↓Left ventricular anterior wall thickness, interseptal thickness on diastole, and relative wall thickness</li> <li>- ↓fibrosis in the left ventricle</li> <li>- ↑ PPAR-<math>\alpha</math> and <math>\delta</math></li> <li>- ↑ plasmatic prostacyclins</li> </ul> | Cardio-protective                               | Not reported |
| Randria mboavonjy JI et al, 2017 [80] | MO seed powder                                    | Not reported                                                                  | Not reported             | in vivo: Wistar Rats induced by spontaneous hypertensive     | 750 mg/day/rat in food for 20 weeks         | <ul style="list-style-type: none"> <li>- ↓ free 8-isoprostane circulating level, vascular p22phox and p47phox expressions</li> <li>- ↑ SOD2</li> <li>- ↓ circulating nitrites and CRP</li> <li>- ↓ iNOS and NF-<math>\kappa</math>B</li> <li>- ↑ endothelium-dependent carbachol-induced relaxation</li> </ul>                                                                                                                                                                                            | Antioxidant, anti-inflammatory                  | Not reported |

|                                  |                               |                                                                                                                                                  |              |                                                                                                             |                                                                        |                                                                                                                                                                                                                                   |                                 |                                                        |
|----------------------------------|-------------------------------|--------------------------------------------------------------------------------------------------------------------------------------------------|--------------|-------------------------------------------------------------------------------------------------------------|------------------------------------------------------------------------|-----------------------------------------------------------------------------------------------------------------------------------------------------------------------------------------------------------------------------------|---------------------------------|--------------------------------------------------------|
| Reddy VP et al., 2017 [81]       | MO leaves polyphenols (MOP)   | Dried MO leaves were extracted with 80% methanol.                                                                                                | Not reported | in vivo: Wistar Rats (high fat-cholesterol diet for 45 days)                                                | 100 and 200mg/kg p.o for 8 weeks                                       | <ul style="list-style-type: none"> <li>- ↓ TC, LDL-C</li> <li>- ↓ HMG-CoA</li> <li>- ↑ fecal bile acid</li> </ul>                                                                                                                 | Lipid metabolism                | not reported                                           |
| Saka WA et al, 2020 [82]         | MO seed oil                   | Pounded MO seeds were extracted with 97% ethanol using Soxhlet apparatus at 78 °C.                                                               | Not reported | in vivo: rats induced by DDVP via inhalation for 15 min daily for 28 days                                   | 300 mg/kg p.o for 28 days.                                             | <ul style="list-style-type: none"> <li>- ↓ lactate dehydrogenase, creatinine kinase, and troponin</li> <li>- ↓ MDA</li> <li>- ↑ SOD and GSH-Px</li> </ul>                                                                         | Antioxidant                     | Not reported                                           |
| Sangkitikomol W et al, 2014 [83] | Methanol MO extract (MOE)     | Powdered MO leaves were extracted with 80% methanol in an ultrasonic bath for 60 min at 40 °C and stored in the dark followed by centrifugation. | 20%          | in vitro: HepG2 cell line                                                                                   | Cell viability MOE (0-3000 mg/L)<br>Treatment: 0,200,400, and 600 mg/L | <ul style="list-style-type: none"> <li>- ↓ oxidative stress in a dose-dependent manner (MOE &gt;100 mg/L, 24 h)</li> <li>- ↓ HMG-CoA-Reductase, PPAR<math>\alpha</math>1, and PPAR<math>\gamma</math> genes expression</li> </ul> | Antioxidant                     | MOE induced cytotoxicity in high dose (2000-3000 mg/L) |
| Shaikh S et al., 2020 [84]       | MO root extract               | Dried powder of roots MO was extracted serially in methanol followed by boiled in a water bath to evaporate methanol.                            | Not reported | in vitro <ul style="list-style-type: none"> <li>- DPPH assay</li> <li>- Pancreatic amylase assay</li> </ul> | 100 to 1000 $\mu$ g/mL with an interval of 100 $\mu$ g/mL              | <ul style="list-style-type: none"> <li>- MO IC50 DPPH assay: 480.64 <math>\mu</math>g/mL</li> <li>- MO IC50 pancreatic amylase assay: 728.97<math>\mu</math>g/mL</li> </ul>                                                       | Antioxidant, glucose metabolism | not reported                                           |
| Sholapur HN et al., 2013 [85]    | Alcoholic and petroleum ether | Powdered bark was macerated in 80% ethanol and petroleum ether.                                                                                  | Not reported | in vivo: Rats were induced by dexamethas                                                                    | Acute and chronic toxicity studies:                                    | Alcoholic Extract 125 and 250 mg/kg: <ul style="list-style-type: none"> <li>- ↓ TG and oral glucose intolerance but not fasting hyperglycemia</li> </ul>                                                                          | Lipid metabolism                | no toxicity was observed                               |

|                              |                                            |                                                                                         |              |                                                                                        |                                                                                                                                                                                                                                                                                    |                                                                                                                                                                                                                                                                                                        |                            |              |
|------------------------------|--------------------------------------------|-----------------------------------------------------------------------------------------|--------------|----------------------------------------------------------------------------------------|------------------------------------------------------------------------------------------------------------------------------------------------------------------------------------------------------------------------------------------------------------------------------------|--------------------------------------------------------------------------------------------------------------------------------------------------------------------------------------------------------------------------------------------------------------------------------------------------------|----------------------------|--------------|
|                              | extracts of MO bark                        |                                                                                         |              | one for 11 days                                                                        | <ul style="list-style-type: none"> <li>- 2 doses of alc. extract (125 and 250 mg/kg)</li> <li>- 2 doses petroleum ether extracts (30 and 60 mg/kg)</li> <li>- single dose each of alc. extract (250 mg/kg)</li> <li>- single dose of petroleum ether extract (60 mg/kg)</li> </ul> | Petroleum ether extract 30 and 60 mg/kg: <ul style="list-style-type: none"> <li>- PEE30 had no effects</li> <li>- PEE 60 ↓TG</li> </ul>                                                                                                                                                                |                            |              |
| Sinha et al, 2011 [86]       | Aqueous ethanolic MO leaves extract (MOLE) | Powdered MO leaves were extracted with 50% methanol                                     | Not reported | in vivo: Swiss albino mice using single dose of 5 Gy of <sup>60</sup> Co c-irradiation | MOLE p.o 300 mg/kg of body weight for 15 days                                                                                                                                                                                                                                      | <ul style="list-style-type: none"> <li>- ↓ translocation of NF-kB from the cytoplasm to the nucleus</li> <li>- ↓ lipid peroxidation</li> <li>- ↑SOD, CAT, GSH, and FRAP</li> </ul>                                                                                                                     | Antioxidant                | not reported |
| Soliman MM et al., 2020 [87] | MO leaf extract (MOLE)                     | MO leaves soaked in a hydro-alcoholic solution and shaken at room temperature for 48 h. | Not reported | In vivo: mice induced by Methotrexate on day 7                                         | MOLE p.o 300 mg/kgBW, 12 days.                                                                                                                                                                                                                                                     | <ul style="list-style-type: none"> <li>- ↓ ALT, ALP, urea, and creatinine in serum</li> <li>- ↑ albumin and total protein</li> <li>- ↓ MDA, ↑ SOD and ↑catalase in serum</li> <li>- ↓ MDA, ↑ SOD, and ↑GSH in liver and kidney</li> <li>- Liver: ↓ BAX, ↓ TIMP, ↑XIAP mRNA expression level</li> </ul> | Antioxidant, antiapoptotic | not reported |

|                        |                                                                               |                                                                                                                                                                                                |       |                                                                                                                                                           |                                      |                                                                                                                                                                                                                                                                                                                                                                                                                                                                                                                                                                                                                                                                                                                                                                                                      |                                                                 |                                                                                                                                                                                                                                                                                                                                                                |
|------------------------|-------------------------------------------------------------------------------|------------------------------------------------------------------------------------------------------------------------------------------------------------------------------------------------|-------|-----------------------------------------------------------------------------------------------------------------------------------------------------------|--------------------------------------|------------------------------------------------------------------------------------------------------------------------------------------------------------------------------------------------------------------------------------------------------------------------------------------------------------------------------------------------------------------------------------------------------------------------------------------------------------------------------------------------------------------------------------------------------------------------------------------------------------------------------------------------------------------------------------------------------------------------------------------------------------------------------------------------------|-----------------------------------------------------------------|----------------------------------------------------------------------------------------------------------------------------------------------------------------------------------------------------------------------------------------------------------------------------------------------------------------------------------------------------------------|
|                        |                                                                               |                                                                                                                                                                                                |       |                                                                                                                                                           |                                      | <ul style="list-style-type: none"> <li>- Renal: Nrf2 unchanged, ↑HO-1, ↓ NF-kB mRNA expression level</li> <li>- Restored liver histopathology architecture</li> <li>- Restored renal histological architecture</li> <li>- ↓ caspase-9 in liver and renal</li> <li>- ↑ Bcl2 in liver and renal</li> </ul>                                                                                                                                                                                                                                                                                                                                                                                                                                                                                             |                                                                 |                                                                                                                                                                                                                                                                                                                                                                |
| Sun C et al, 2019 [88] | 1-O-(4-hydroxymethylphenyl)- $\alpha$ -L-rhamnopyranoside (MPG) from MO seeds | Seed powder were de-oiled with petroleum ether and ddH <sub>2</sub> O at 95°C. n-Butanol was used for further fractionation, followed with sub-fractionation with MOE-BuOH and chromatography. | 18.1% | <p><i>in vitro</i>: LO2 cells induced by CCl<sub>4</sub></p> <p><i>In vivo</i>: ICR mice induced by single dose CCl<sub>4</sub> on 8th days treatment</p> | 50, 100, 150 mg/kg BW p.o for 7 days | <p><i>in vitro</i>:</p> <ul style="list-style-type: none"> <li>- ↑ cell viability</li> <li>- ↑ intracellular SOD activities</li> <li>- ↓ LDH</li> <li>- leakage in CCl<sub>4</sub>-treated cells.</li> </ul> <p><i>in vivo</i>:</p> <ul style="list-style-type: none"> <li>- ↓ abnormal enlargement liver weight</li> <li>- ↓ ALT, ALP, AKP in serum</li> <li>- improve histopathological analysis</li> <li>- enzymatic antioxidant activities (↑SOD, ↑CAT, and ↑GSH-Px)</li> <li>- non-enzymatic antioxidant activities (↑T-AOC and ↑GSH)</li> <li>- ↓ hepatic MDA level</li> <li>- ↓ hepatic ROS production</li> <li>- ↓ TNF-<math>\alpha</math>, IL-1<math>\beta</math>, and MCP-1 levels in liver</li> <li>- ↑ IL-10 in the systemic circulation</li> <li>- ↓ apoptotic hepatic cells</li> </ul> | Antioxidant, anti-inflammatory, antiapoptotic, hepatoprotective | <ul style="list-style-type: none"> <li>- no notable cytotoxic effects at 24 h, 48 h, and 72 h (5–100 <math>\mu</math>g/mL)</li> <li>- first phase acute oral toxicity in mice: up to 1000 mg/kg → no adverse effects and death</li> <li>- second phase oral toxicity in mice: up to 2000 mg/kg single administration → no adverse effects and death</li> </ul> |

|                         |                                                           |                                                                                                                                                                                            |                       |                                                                  |                                                                                   |                                                                                                                                                                                                                                                                                                                                                                                                                                                                                                                                                                                  |                                                         |                                                                                                     |
|-------------------------|-----------------------------------------------------------|--------------------------------------------------------------------------------------------------------------------------------------------------------------------------------------------|-----------------------|------------------------------------------------------------------|-----------------------------------------------------------------------------------|----------------------------------------------------------------------------------------------------------------------------------------------------------------------------------------------------------------------------------------------------------------------------------------------------------------------------------------------------------------------------------------------------------------------------------------------------------------------------------------------------------------------------------------------------------------------------------|---------------------------------------------------------|-----------------------------------------------------------------------------------------------------|
| Tan WS et al, 2015 [89] | 80% hydroethanolic extract of MO flower                   | MO flower powder was macerated in hydroethanolic solvent under a rotary shaker at room temperature.                                                                                        | Not reported          | <i>in vitro</i> :<br>The murine macrophage cell line, RAW 264.7, | MTT assay:<br>15.625 - 1000 µg/mL<br><i>in vitro</i> :<br>100 µg/mL and 200 µg/mL | <ul style="list-style-type: none"> <li>● ↓ secretion and expression of NO, PGE2, IL-6, IL-1β, TNF-α, NF-κB, iNOS, and COX-2.</li> <li>● ↑ IL-10 and IκB-α</li> <li>● dose-dependent manner (100 µg/mL and 200 µg/mL).</li> </ul>                                                                                                                                                                                                                                                                                                                                                 | Antioxidant, anti-inflammatory                          | Not exhibited any toxicity to macrophages at concentrations ranging from 15.625 to under 250 µg/mL. |
| Tang Y et al, 2017 [90] | Aqueous and ethanolic extract MO leaves, stems, and seeds | Leaves, stems, and seeds of MO were boiled separately distilled water and with 70% ethanol.                                                                                                | Not reported          | <i>in vivo</i> :<br>db/db mice                                   | MO leaves ethanolic extract 150 mg/kg/day for 5 weeks (gastric intubation)        | <p>DPPH activity:<br/>ethanolic leaf extract the strongest hydroxyl radical scavenging activity</p> <p><i>In vivo</i>:</p> <ul style="list-style-type: none"> <li>- ↓ fasting plasma glucose, triglyceride, and LDL cholesterol</li> <li>- ↑ insulin levels</li> <li>- ↓ histopathological damage, TNF-α, IL-1β, IL-6, cyclooxygenase-2, and iNOS in renal tissue</li> </ul>                                                                                                                                                                                                     | Glucose metabolism, anti-inflammatory, nephroprotective | not reported                                                                                        |
| Tian et al, 2021 [91]   | MO polysaccharides (MOP)                                  | MO powder was macerated in boiled distilled water and centrifuged. Afterwards, the supernatant was collected and concentrated. The Sevag method was used to remove the protein impurities. | Purity of MOP: 83.42% | <i>in vivo</i> :<br>male SPF C57BL/6 mice                        | MOP p.o: 0, 20, 40 and 60 mg/kg bw for 30 days                                    | <p>Serum:</p> <ul style="list-style-type: none"> <li>- ↓ glucose, total cholesterol, &amp; MDA</li> <li>- Improved SOD and catalase in serum</li> </ul> <p>Small intestine</p> <ul style="list-style-type: none"> <li>- Improved the villi length and crypt depth in both ileum and jejunum</li> <li>- ↑ the ratio of villi length to crypt depth in jejunum</li> <li>- ↑ beneficial bacteria</li> <li>- ↓ harmful bacteria in the caecum</li> <li>- MOP regulated 114 metabolites enriched in the pathway related to the synthesis and metabolism of micromolecules.</li> </ul> | Glucose metabolism, antioxidant, gut microbiome         | not reported                                                                                        |



|                                |                                                         |                                                                                                                       |              |                                                                            |                                                                                                                                |                                                                                                                                                                                                                                                                                                                                                                                                               |                                       |                                                                                                            |
|--------------------------------|---------------------------------------------------------|-----------------------------------------------------------------------------------------------------------------------|--------------|----------------------------------------------------------------------------|--------------------------------------------------------------------------------------------------------------------------------|---------------------------------------------------------------------------------------------------------------------------------------------------------------------------------------------------------------------------------------------------------------------------------------------------------------------------------------------------------------------------------------------------------------|---------------------------------------|------------------------------------------------------------------------------------------------------------|
| Umar et al., 2018 [92]         | Hexane, ethyl acetate, and methanol extracts of MO root | MO roots were extracted with hexane, ethyl acetate, and methanol separately in Soxhlet apparatus at 50°C.             | Not reported | in vivo: male <i>Rattus norvegicus</i> , albino variety induced by alloxan | Powder root extract: 15g/kg BW/day p.o for 4 weeks. methanolic extract of MO roots (1 g/kg BW/day, i.p. injection for 4 weeks. | <ul style="list-style-type: none"> <li>- ↓ fasting blood glucose levels</li> <li>- ↓ insulin resistance</li> <li>- ↑ SOD, CAT, GPx</li> </ul>                                                                                                                                                                                                                                                                 | Glucose metabolism, antioxidant       | <ul style="list-style-type: none"> <li>- LD50 was above 5000 mg/kg</li> <li>- no death observed</li> </ul> |
| Vargas-Tineo et al., 2020 [93] | Aqueous extract of MO leaves                            | Water extraction at 90 C                                                                                              | Not reported | in vivo: male <i>Rattus norvegicus</i> , albino variety induced by alloxan | 200 mg/kg po                                                                                                                   | ↓ glycemia                                                                                                                                                                                                                                                                                                                                                                                                    | Glucose metabolism                    | Not reported                                                                                               |
| Velaga MK et al., 2014 [94]    | M. oleifera seed powder                                 | Powder MO seeds were suspended in distilled water.                                                                    | Not reported | in vivo: Male Wistar rats induced by 2000 ppm of lead acetate for 2 weeks  | 500 mg/kg p.o on 7 days after lead acetate for 1 week                                                                          | Brain, liver, and kidney <ul style="list-style-type: none"> <li>- ↓ reactive oxygen species (ROS)</li> <li>- ↓ lipid peroxidation products (LPP)</li> <li>- ↓ total protein carbonyl content (TPCC)</li> <li>- ↓ metal content</li> </ul> Blood <ul style="list-style-type: none"> <li>- ↑ delta-aminolevulinic acid dehydratase (ALAD) activity</li> <li>- ↑ RBC, WBC, hemoglobin, and hematocrit</li> </ul> | Antioxidant                           | Not reported                                                                                               |
| Vera-Núñez N et al., 2021 [95] | Lectin on MO seeds: WSMoL                               | Distilled water and ammonium sulfate were used to extract MO seeds, followed with centrifugation. The precipitate was | Not reported | in vivo: adult C57BL/6 mice by combining a high-fat diet                   | WSMoL: 5 mg/kg bodyweight for 21 days                                                                                          | <ul style="list-style-type: none"> <li>- ↓ fasting blood glucose levels</li> <li>- ↓ insulin resistance</li> <li>- improve cardiac LV ejection fraction</li> </ul>                                                                                                                                                                                                                                            | Glucose metabolism, cardio-protective | no adverse effects on body weights were observed                                                           |

|                                     |                               |                                                                                                                                                                                                                           |              |                                                                                         |                                                                                                                                                                                            |                                                                                                                                                                                                |                                    |                                                                                                                                                                       |
|-------------------------------------|-------------------------------|---------------------------------------------------------------------------------------------------------------------------------------------------------------------------------------------------------------------------|--------------|-----------------------------------------------------------------------------------------|--------------------------------------------------------------------------------------------------------------------------------------------------------------------------------------------|------------------------------------------------------------------------------------------------------------------------------------------------------------------------------------------------|------------------------------------|-----------------------------------------------------------------------------------------------------------------------------------------------------------------------|
|                                     |                               | resuspended and dialyzed. Using a chitin column, the dialyzed fraction is loaded and the WSMoL is eluted with an acid solution of sodium acetate. Dialyzed against distilled water, the isolated lectin is characterized. |              | and low doses of STZ (6 wk)                                                             |                                                                                                                                                                                            |                                                                                                                                                                                                |                                    |                                                                                                                                                                       |
| Villarruel-López A et al, 2018 [96] | Powdered leaves extract MO    | Dried leaves from 40°C (24h) were pounded.                                                                                                                                                                                | Not reported | in vivo-toxicity: Balb-C56 male mice<br><br>in vivo-diabetic rats: Alloxan on S.D. rats | Acute toxicity: 100, 200, 500 mg/kg of Moringa oleifera for 7 days observed<br><br>Diabetic-rats: Moringa oleifera was 50 mg/day, and the glibenclamide dose was 600 µg/kg/day for 8 weeks | <ul style="list-style-type: none"> <li>- hypoglycemic effect</li> <li>- no change in enumeration of lactic acid bacteria</li> </ul>                                                            | Glucose metabolism, gut Microbiome | <ul style="list-style-type: none"> <li>- no lethal dose was determined</li> <li>- no adverse effects were observed</li> <li>- no genotoxicity was observed</li> </ul> |
| Wang F et al, 2019 [97]             | Niazirin from aqueous MO seed | Not reported                                                                                                                                                                                                              | Not reported | in vitro: VSMCs (vascular                                                               | in vitro: 5 and 25 uM                                                                                                                                                                      | <ul style="list-style-type: none"> <li>- DPPH</li> <li>- ↓ radical scavenging activity</li> <li>- in vitro and in vivo</li> <li>- ↓ the proliferation of high glucose-induced VSMCs</li> </ul> | Antioxidant                        | not observed                                                                                                                                                          |

|                         |                                                       |                                                                                                                                                                                 |              |                                                                                              |                                                                                    |                                                                                                                                                                                                                                                                                                                                                                                                                                                                                                                                                                      |                             |                                                                                                                                                                             |
|-------------------------|-------------------------------------------------------|---------------------------------------------------------------------------------------------------------------------------------------------------------------------------------|--------------|----------------------------------------------------------------------------------------------|------------------------------------------------------------------------------------|----------------------------------------------------------------------------------------------------------------------------------------------------------------------------------------------------------------------------------------------------------------------------------------------------------------------------------------------------------------------------------------------------------------------------------------------------------------------------------------------------------------------------------------------------------------------|-----------------------------|-----------------------------------------------------------------------------------------------------------------------------------------------------------------------------|
|                         |                                                       |                                                                                                                                                                                 |              | smooth muscle cells)<br><br>in vivo: ICR mice (high-fat diet for 8 wks+ inject STZ 40 mg/kg) | in vivo: 10 and 40 mg/kg/day for 2 wks                                             | <ul style="list-style-type: none"> <li>- ↓ ROS and MDA</li> <li>- ↑T-AOC, SOD, GPx levels</li> <li>- eliminate the high glucose-induced PKC<math>\zeta</math> activation, indicated by Thr410 phosphorylation and inhibition of the Nox4 protein expression</li> </ul>                                                                                                                                                                                                                                                                                               |                             |                                                                                                                                                                             |
| Wang F et al, 2019 [98] | Polysaccharide from MO leaf: MOs-2-a                  | Chopped MO leaves were extracted using by deionized water and loaded into a macro-porous resin column. Ethanol was added, centrifuged and dried to obtain crude polysaccharide. | Not reported | in vivo: ICR mice                                                                            | (50 mg/kg for MOs-2-a-H group and 10 mg/kg for MOs-2-a-L group)                    | <ul style="list-style-type: none"> <li>- ↓ TNF-<math>\alpha</math>, diamine oxidase (DAO), and d-lac levels in the intestine</li> <li>- improve the integrity of intestinal tissue in MOs-2-a group (villus height &amp; mucosal thickness)</li> <li>- ↑ the activity of amylase; Lipase; Alkaline phosphatase; Trypsin.</li> <li>- ↓ the nitrogen content of feces</li> <li>- keep the pH at a faintly acidic level</li> <li>- restored gut microbiota composition</li> <li>- ↑ the bacteria for anti-obesity effects, SCFA, and lactic acid production.</li> </ul> | Antioxidant, gut microbiome | 28 days observation: <ul style="list-style-type: none"> <li>- BW higher than in mice fed standard</li> <li>- increase the viscera index of the spleen and thymus</li> </ul> |
| Wang F et al, 2017 [99] | The macroporous resin adsorption extract of MO seeds: | MO seeds were extracted two times with boiling water and passed over a macro-porous resin column to gain a crude extract. It was loaded into Medium Pressure                    | Not reported | in vitro: HepG2 cell<br><br>in vivo: STZ-induced mice.                                       | in vitro: 10, 20, 40, 80, 160, dan 320 ug/mL<br><br>in vivo: dose of 20 mg/kg/day, | Compound 1, 4, and 5: <ul style="list-style-type: none"> <li>- promote the glucose consumption of insulin resistance cells</li> <li>- reduce blood glucose levels of STZ-induced mice.</li> </ul>                                                                                                                                                                                                                                                                                                                                                                    | Glucose metabolism          |                                                                                                                                                                             |

|                               |                                                                      |                                                                                                             |              |                                                                                                        |                                               |                                                                                                                                                                                                                                                                                                                                                              |                                       |                                                     |
|-------------------------------|----------------------------------------------------------------------|-------------------------------------------------------------------------------------------------------------|--------------|--------------------------------------------------------------------------------------------------------|-----------------------------------------------|--------------------------------------------------------------------------------------------------------------------------------------------------------------------------------------------------------------------------------------------------------------------------------------------------------------------------------------------------------------|---------------------------------------|-----------------------------------------------------|
|                               |                                                                      | Preparative Liquid Chromatography with an ODS column to obtain niiazirin.                                   |              |                                                                                                        |                                               |                                                                                                                                                                                                                                                                                                                                                              |                                       |                                                     |
| Waterman C et al., 2015 [100] | Moringa isothiocyanates (MICs)                                       | Fresh moringa leaves were blended in 25°C water at 25°C for 30 min, centrifuged, filtered, and lyophilized. | 3            | in vivo:<br>C57BL/6L mice fed a very high-fat diet (VHFD)<br><br>in vitro:<br>H4IIE rat hepatoma cells | 66 mg/kg/d of MICs for 12 weeks               | in vivo:<br>- ↑ glucose tolerance and insulin signaling (IRS-1, p-IRS-1 in the liver )<br>- ↑ p-IRS1, IRS1, IRS2, IR β, and GLUT4 in the muscle<br>- did not develop fatty liver disease<br>- ↓ plasma insulin, leptin, resistin, cholesterol, IL-1β, TNFα,<br>- ↓ hepatic G6P expression.<br>in vitro:<br>Inhibition of gluconeogenesis and G6P expression. | Glucose metabolism, anti-inflammatory | without any other observable side effect (12 weeks) |
| Yang Y et al, 2020 [101]      | Bioactive compound :O-Ethyl-4-[(α-l-rhamnosyl oxy) benzyl] carbamate | Not clearly stated                                                                                          | Not reported | DPP-IV assay                                                                                           |                                               | IC <sub>50</sub> = 798 nM to inhibit DPP-IV                                                                                                                                                                                                                                                                                                                  | Glucose metabolism                    | not reported                                        |
| Yassa HD et al., 2014 [102]   | Aqueous extract of MO leaves                                         | Dried and powdered leaves were boiled in water for 15 min.                                                  | Not reported | in vivo:<br>40 S.D male albino rats STZ-induced 60 mg/kg BW in 0.1 mol/L citrate buffer (pH 4.5) i.p   | 200 mg/kg aqueous extract of MO leaves (8 wk) | - ↓ glutathione and lipid peroxidation product and MDA, in pancreatic tissue.<br>- Amelioration of the altered FPG (from 380% to 145%), reduced glutathione (from 22% to 73%) and MDA (from 385% to 186%) vs control.                                                                                                                                        | Antioxidant                           | not reported                                        |

|  |  |  |  |                         |  |                                                                                                                                                                                                                                                                                                 |  |  |
|--|--|--|--|-------------------------|--|-------------------------------------------------------------------------------------------------------------------------------------------------------------------------------------------------------------------------------------------------------------------------------------------------|--|--|
|  |  |  |  | after overnight fasting |  | <ul style="list-style-type: none"> <li>- Marked reversed histopathological damage of islet cells.</li> <li>- ↑ areas of positive purple modified Gomori stained-cells (from 60% to 91%) morphometrically</li> <li>- ↓ percentage of collagen fibers (from 199% to 120%) vs. control.</li> </ul> |  |  |
|--|--|--|--|-------------------------|--|-------------------------------------------------------------------------------------------------------------------------------------------------------------------------------------------------------------------------------------------------------------------------------------------------|--|--|

ALP: alkaline phosphatase, ALT: alanine aminotransferase, ANP: atrial natriuretic peptide, AST: aspartate aminotransferase, AOPP: advanced oxidation protein products, BiP: Binding immunoglobulin protein, BUN: Blood urea nitrogen, BNP: B type natriuretic peptide, BP: blood pressure, BW: body weight, CAT: catalase, CD: conjugated dienes, CHOP: CCAAT-enhancer binding protein homologous protein, CK-MB: Creatine kinase-MB, COL1 $\alpha$ 1: collagen type I alpha I, COX-2: cyclooxygenase-2, Cr: Creatinine, CRP: C-reactive protein, DDVP: dichlorvos, DPPH: 2,2-diphenyl-1-picrylhydrazyl, ECG: electrocardiogram, FAS: fatty acid synthase, FPG: fasting plasma glucose, FRAP: Ferric Reducing Antioxidant Power, G6P: glucose-6-phosphatase, G6PD: glucose-6-phosphate dehydrogenase, GGT:  $\gamma$ -glutamyl transferase, GPx: Glutathione peroxidase, GR: glutathione-reductase, GSH: Glutathione, GST: Glutathione S-transferase, Hb: hemoglobin, HDL: high-density lipoprotein, HK: hexokinase, HP: hydroperoxides, HOMA-IR: Homeostasis Model Assessment-Insulin Resistance, iNOS: inducible NO synthase, I $\kappa$ B- $\alpha$ : inhibitor of  $\kappa$ B, IL-1 $\beta$ : interleukin-1 $\beta$ , IL-6: interleukin-6, IL-10: interleukin-10, iNOS: inducible nitric oxide synthase, i.p.: intraperitoneal, p-IRS-1: phospho-IRS-1, IRS-1: insulin receptor substrate-1; IRS-2: insulin receptor substrate-2; IR $\beta$ : insulin receptor beta ITT: insulin tolerance test, LDH: lactate dehydrogenase, LDL: low density lipoprotein, LPL: lipoprotein lipase, LPP: lipid peroxidation products, LPS: lipopolysaccharides, MCV: mean corpuscular volume, MCH: Mean corpuscular hemoglobin, MCHC: mean corpuscular hemoglobin concentration., MCP-1: monocyte chemoattractant protein-1, MDA: malondialdehyde, MDM: monocyte-derived macrophages,  $\beta$ -MHC: beta major histocompatibility complex, MO: Moringa oleifera, MPV: Mean Platelet Volume, NF- $\kappa$ B: nuclear factor-kappa B (NF- $\kappa$ B), NO: nitric oxide, PC: pyruvate carboxylase, PCV: Pack cell volume, PDI: protein disulfide isomerase, P-LCR: Platelet Large Cell Ratio, PDW: Platelet Distribution Width, PGE2: prostaglandin E2

RBC: Red blood cell, RDW<sub>a</sub>: red blood cell distribution width absolute, ROS: reactive oxygen species, R-QUICKI: revised quantitative insulin sensitivity check index, SCFA: short-chain fatty acid, S.D.: Sprague Dawley, SOD: superoxide dismutase, STZ: streptozotocin, TAC: total antioxidant capacity, TBARS: Thiobarbituric acid-reactive substances, TC: total cholesterol, TG: triglyceride, TNF- $\alpha$ : Tumor Necrosis Factor-Alfa, TP: total protein, TPCC: total protein carbonyl content, WBC: White blood cells

**Table S2. Clinical trials of *Moringa oleifera***

| Author, year                            | Type of extracts / main bioactive compounds used | Methods of extracts / bioactive compounds preparation                                              | Yield of preparation per raw material (wt/wt) | Sample size / subjects                                                                                      | Treatments and control                                       | Duration                                                     | Effects                                                                                                                                                            | Adverse events (AE)                         |
|-----------------------------------------|--------------------------------------------------|----------------------------------------------------------------------------------------------------|-----------------------------------------------|-------------------------------------------------------------------------------------------------------------|--------------------------------------------------------------|--------------------------------------------------------------|--------------------------------------------------------------------------------------------------------------------------------------------------------------------|---------------------------------------------|
| Anthanont, 2016 [103]                   | Leaf powder capsules                             | Dried MO leaves were powdered and filled into a gelatin capsule.                                   | Not reported                                  | 10 / healthy subjects                                                                                       | Baseline: 0 g,<br>Week 2: 1 g<br>Week 4: 2 g<br>Week 6: 4 g. | 8 weeks                                                      | <ul style="list-style-type: none"> <li>- No change in BUN, Cr, AST, and ALT, plasma glucose</li> <li>- ↑ plasma insulin</li> <li>- ↑ insulin secretion.</li> </ul> | No AE up to high dose (4 g) administration. |
| Dominguez-Rodriguez M et al, 2016 [104] | MO. leaves extract                               | Not reported                                                                                       | Not reported                                  | Crossover study<br>Placebo: 24<br>Treatment: 24 /<br>Obese type 2 diabetics treated with metformin subjects | NA                                                           | Period 1: 10 weeks<br>Washout: 2 weeks<br>Period 2: 10 weeks | <ul style="list-style-type: none"> <li>- ↓ BMI, insulin</li> <li>- Trends to LDL and HbA1c reduction.</li> <li>- ↓ BP.</li> <li>- ↑ HDL</li> </ul>                 | Not reported                                |
| Ezzat SM et al., 2020 [41]              | MO leaves hard gelatin capsules                  | Powdered MO leaves were macerated using 70% ethanol and evaporated to yield dried ethanol extract. | 10%                                           | 15 subjects / who were overweight or obese                                                                  | 400 mg/capsule                                               | 8 weeks                                                      | <ul style="list-style-type: none"> <li>- ↓ significantly in BMI, TC, and LDL vs. baseline.</li> <li>- Normalization of AST, ALT, and alanine.</li> </ul>           | Not reported                                |
| Ifeoma, 2020 [105]                      | Steamed MO                                       | Not reported                                                                                       | Not reported                                  | Control placebo: 6 subjects                                                                                 | Group 1: control<br>Group 2: 20 g                            | 14 days                                                      | <ul style="list-style-type: none"> <li>- No difference in the waist</li> </ul>                                                                                     | Not reported                                |

|                            |                              |                                                                                                   |              |                                                                                                      |                                |                       |                                                                                                                                                                                                                                                                                                                                                                                                                                |              |
|----------------------------|------------------------------|---------------------------------------------------------------------------------------------------|--------------|------------------------------------------------------------------------------------------------------|--------------------------------|-----------------------|--------------------------------------------------------------------------------------------------------------------------------------------------------------------------------------------------------------------------------------------------------------------------------------------------------------------------------------------------------------------------------------------------------------------------------|--------------|
|                            | leaves                       |                                                                                                   |              | Treatment:<br>3 groups, with<br>each group,<br>consists of 6<br>subjects /<br>T2DM                   | Group 3: 40 g<br>Group 4: 60 g |                       | <p>circumference, waist-hip ratio, and FBG in all groups.</p> <ul style="list-style-type: none"> <li>- ↓ SBP, no difference in DBP and TC in Groups 3 and 4.</li> <li>- ↓ LDL in Group 2.</li> <li>- ↑ TG and LDL in Group 3.</li> <li>- ↑ HDL in groups 1, 2, and 4.</li> <li>- ↓ Hb, packed cell volume, WBC, in Group 4.</li> </ul> <p>Significant changes observed in the parameters assessed were not dose-dependent.</p> |              |
| Leone A et al., 2018 [106] | Moringa oleifera leaf powder | The leaves were dried through a shade-dried and ground to a fine powder with an electric grinder. | Not reported | 10 nondiabetic and 17 diabetic subjects, each received both control and Moringa oleifera leaf powder | 20 g added to a meal           | Single administration | Lower increment of postprandial blood glucose in diabetic subjects                                                                                                                                                                                                                                                                                                                                                             | Not reported |

|                                    |                           |                                                                                                  |              |                                                                                     |                                                                                                                                                                 |         |                                          |                            |
|------------------------------------|---------------------------|--------------------------------------------------------------------------------------------------|--------------|-------------------------------------------------------------------------------------|-----------------------------------------------------------------------------------------------------------------------------------------------------------------|---------|------------------------------------------|----------------------------|
| Sandoval & Jimeno, 2013 [107]      | MO powdered leaf capsules | Leaves were dried and capsuled                                                                   | Not reported | Placebo: 35 subjects<br>Treatment group: 33 subjects / High baseline LDL-c patients | Placebo: 2 capsules 3x a day placebo capsule<br>Treatment group: 2 capsules 3x a day (350 mg/capsule or 2100 mg/day)                                            | 30 days | A similar reduction of LDL-c vs. placebo | No serious adverse effects |
| Taweerut hana R et al., 2017 [108] | MO powdered leaf capsules | Dried leaves of MO, were ground, sifted to be powder. The powder was filled into capsule shells. | Not reported | Placebo: 16 subjects<br>Treatment group: 16 subjects / Therapy naïve T2DM patients  | Placebo: 8 placebo capsules<br>Treatment group: 4 grams/day (8 capsules)<br>4 capsules each before breakfast and dinner time (500 mg MO powdered leaf/capsules) | 4 weeks | no effect on glycemic control            | No adverse effects         |

AE: adverse events, ALT: alanine aminotransferase, AST: aspartate aminotransferase, BUN: Blood urea nitrogen, BP: blood pressure, BMI: body mass index, BW: body weight, Cr: Creatinine, DBP: Diastolic blood pressure, FBG: fasting blood glucose, HDL: high-density lipoprotein, LDL: low-density lipoprotein, TC: total cholesterol, MO: Moringa oleifera, SBP systolic blood pressure, T2DM: type 2 diabetes mellitus TG: triglyceride, WBC: white blood cells.



## REFERENCES

- [1] S.O. Abarikwu, S. Benjamin, S.G. Ebah, G. Obilor, and G. Agbam, Protective effect of *Moringa oleifera* oil against HgCl<sub>2</sub>-induced hepato- and nephrotoxicity in rats. *J Basic Clin Physiol Pharmacol* 28 (2017) 337-345.
- [2] A. Abd El Latif, S. El Bialy Bel, H.D. Mahboub, and M.A. Abd Eldaim, *Moringa oleifera* leaf extract ameliorates alloxan-induced diabetes in rats by regeneration of  $\beta$  cells and reduction of pyruvate carboxylase expression. *Biochem Cell Biol* 92 (2014) 413-9.
- [3] M.A. Abd Eldaim, A. Shaban Abd Elrasoul, and S.A. Abd Elaziz, An aqueous extract from *Moringa oleifera* leaves ameliorates hepatotoxicity in alloxan-induced diabetic rats. *Biochem Cell Biol* 95 (2017) 524-530.
- [4] N.Z. Abd Rani, E. Kumolosasi, M. Jasamai, J.A. Jamal, K.W. Lam, and K. Husain, In vitro anti-allergic activity of *Moringa oleifera* Lam. extracts and their isolated compounds. *BMC Complement Altern Med* 19 (2019) 361.
- [5] Y.M. Abd-Elhakim, W.A. Mohamed, K.M.E. Bohi, H.A. Ali, F.A. Mahmoud, and T.M. Saber, Prevention of melamine-induced hepatorenal impairment by an ethanolic extract of *Moringa oleifera*: Changes in KIM-1, TIMP-1, oxidative stress, apoptosis, and inflammation-related genes. *Gene* 764 (2021) 145083.
- [6] M.E. Abdel Fattah, H.M. Sobhy, A. Reda, and H.M.A. Abdelrazek, Hepatoprotective effect of *Moringa oleifera* leaves aquatic extract against lead acetate-induced liver injury in male Wistar rats. *Environ Sci Pollut Res Int* 27 (2020) 43028-43043.
- [7] M.M. Abdel-Daim, S. Alkahtani, R. Almeer, and G. Albasher, Alleviation of lead acetate-induced nephrotoxicity by *Moringa oleifera* extract in rats: highlighting the antioxidant, anti-inflammatory, and antiapoptotic activities. *Environ Sci Pollut Res Int* 27 (2020) 33723-33731.
- [8] M.M. Abdel-Daim, S.R. Khalil, A. Awad, E.H. Abu Zeid, R.A. El-Aziz, and H.A. El-Serehy, Ethanolic Extract of *Moringa oleifera* Leaves Influences NF- $\kappa$ B Signaling Pathway to Restore Kidney Tissue from Cobalt-Mediated Oxidative Injury and Inflammation in Rats. *Nutrients* 12 (2020).
- [9] K.H. Abdou, W.A. Moselhy, H.M. Mohamed, E.S. El-Nahass, and A.G. Khalifa, *Moringa oleifera* Leaves Extract Protects Titanium Dioxide Nanoparticles-Induced Nephrotoxicity via Nrf2/HO-1 Signaling and Amelioration of Oxidative Stress. *Biol Trace Elem Res* 187 (2019) 181-191.
- [10] S.M. Abou-Zeid, A.I. Ahmed, A. Awad, W.A. Mohammed, M.M.M. Metwally, R. Almeer, M.M. Abdel-Daim, and S.R. Khalil, *Moringa oleifera* ethanolic extract attenuates tilmicosin-induced renal damage in male rats via suppression of oxidative stress, inflammatory injury, and intermediate filament proteins mRNA expression. *Biomed Pharmacother* 133 (2021) 110997.
- [11] E.H. Abu-Zeid, D.M. Abdel Fattah, A.H. Arisha, T.A. Ismail, D.M. Alsadek, M.M.M. Metwally, A.A. El-Sayed, and A.T. Khalil, Protective prospects of eco-friendly synthesized selenium nanoparticles using *Moringa oleifera* or *Moringa oleifera* leaf extract against melamine induced nephrotoxicity in male rats. *Ecotoxicol Environ Saf* 221 (2021) 112424.
- [12] A.A. Adedapo, O.O. Falayi, and A.A. Oyagbemi, Evaluation of the analgesic, anti-inflammatory, antioxidant, phytochemical, and toxicological properties of the methanolic

- leaf extract of commercially processed *Moringa oleifera* in some laboratory animals. *J Basic Clin Physiol Pharmacol* 26 (2015) 491-9.
- [13] A.B. Aa, J. Om, E. Ts, and A. Ga, Preliminary phytochemical screening, antioxidant and antihyperglycaemic activity of *Moringa oleifera* leaf extracts. *Pak J Pharm Sci* 30 (2017) 2217-2222.
- [14] D. Aekthammarat, P. Pannangpetch, and P. Tangsucharit, *Moringa oleifera* leaf extract lowers high blood pressure by alleviating vascular dysfunction and decreasing oxidative stress in L-NAME hypertensive rats. *Phytomedicine* 54 (2019) 9-16.
- [15] D. Aekthammarat, P. Pannangpetch, and P. Tangsucharit, *Moringa oleifera* leaf extract induces vasorelaxation via endothelium-dependent hyperpolarization and calcium channel blockade in mesenteric arterial beds isolated from L-NAME hypertensive rats. *Clin Exp Hypertens* 42 (2020) 490-501.
- [16] D. Aekthammarat, P. Tangsucharit, P. Pannangpetch, T. Sriwantana, and N. Sibmooh, *Moringa oleifera* leaf extract enhances endothelial nitric oxide production leading to relaxation of resistance artery and lowering of arterial blood pressure. *Biomed Pharmacother* 130 (2020) 110605.
- [17] B.Y. Aju, R. Rajalakshmi, and S. Mini, Protective role of *Moringa oleifera* leaf extract on cardiac antioxidant status and lipid peroxidation in streptozotocin-induced diabetic rats. *Heliyon* 5 (2019) e02935.
- [18] A.S. Akinrinde, O. Oduwole, F.J. Akinrinmade, and F.B. Bolaji-Alabi, Nephroprotective effect of methanol extract of *Moringa oleifera* leaves on acute kidney injury induced by ischemia-reperfusion in rats. *Afr Health Sci* 20 (2020) 1382-1396.
- [19] A.L. Al-Malki, and H.A. El Rabey, The antidiabetic effect of low doses of *Moringa oleifera* Lam. seeds on streptozotocin-induced diabetes and diabetic nephropathy in male rats. *Biomed Res Int* 2015 (2015) 381040.
- [20] G. Albasher, S. Al Kahtani, M.S. Alwahibi, and R. Almeer, Effect of *Moringa oleifera* Lam. methanolic extract on lead-induced oxidative stress-mediated hepatic damage and inflammation in rats. *Environ Sci Pollut Res Int* 27 (2020) 19877-19887.
- [21] F. Alhakmani, S. Kumar, and S.A. Khan, Estimation of total phenolic content, in-vitro antioxidant and anti-inflammatory activity of flowers of *Moringa oleifera*. *Asian Pac J Trop Biomed* 3 (2013) 623-7; discussion 626-7.
- [22] S. Anudeep, V.K. Prasanna, S.M. Adya, and C. Radha, Characterization of soluble dietary fiber from *Moringa oleifera* seeds and its immunomodulatory effects. *Int J Biol Macromol* 91 (2016) 656-62.
- [23] L.C. Araújo, J.S. Aguiar, T.H. Napoleão, F.V. Mota, A.L. Barros, M.C. Moura, M.C. Coriolano, L.C. Coelho, T.G. Silva, and P.M. Paiva, Evaluation of cytotoxic and anti-inflammatory activities of extracts and lectins from *Moringa oleifera* seeds. *PLoS One* 8 (2013) e81973.
- [24] R.O. Arise, O.R. Aburo, S.T. Farohunbi, and A.A. Adewale, Antidiabetic and antioxidant activities of ethanolic extract of dried flowers of *Moringa oleifera* in streptozotocin-induced diabetic rats. *Acta Facultatis Medicae Naissensis* 33 (2016) 259-272.
- [25] A. Atta, H. Soufy, S. Nasr, A. Soliman, S. Nassar, A.H. Almaweri, T. El-Aziz, H. Desouky<sup>3</sup>and, and A. Abdalla, Hepatoprotective and antioxidant effects of methanol extract of *Moringa oleifera* leaves in rats. *Wulfenia* 24 (2017).

- [26] E.S. Attakpa, G.A. Bertin, N.W. Chabi, J.M. Ategbo, B. Seri, and N.A. Khan, Moringa oleifera-rich diet and T cell calcium signaling in spontaneously hypertensive rats. *Physiol Res* 66 (2017) 753-767.
- [27] S.B. Azad, P. Ansari, S. Azam, S.M. Hossain, M.I. Shahid, M. Hasan, and J.M.A. Hannan, Anti-hyperglycaemic activity of Moringa oleifera is partly mediated by carbohydrase inhibition and glucose-fiber binding. *Biosci Rep* 37 (2017).
- [28] M. Azevedo Í, I. Araújo-Filho, M.M.A. Teixeira, M. Moreira, and A.C. Medeiros, Wound healing of diabetic rats treated with Moringa oleifera extract. *Acta Cir Bras* 33 (2018) 799-805.
- [29] Y. Bao, J. Xiao, Z. Weng, X. Lu, X. Shen, and F. Wang, A phenolic glycoside from Moringa oleifera Lam. improves the carbohydrate and lipid metabolisms through AMPK in db/db mice. *Food Chem* 311 (2020) 125948.
- [30] N. Bitrus, I. Uchendu, and O. Orji, The role of crude methanol leaf extract of moringa oleifera in protection against hyperlipidemia and cardiomyopathy in albino rat fed a high cholesterol diet and carbimazole. *Pharmacologyonline* 3 (2018) 261-271.
- [31] K.H. Chen, Y.J. Chen, C.H. Yang, K.W. Liu, J.L. Chang, S.F. Pan, T.B. Lin, and M.J. Chen, Attenuation of the extract from Moringa oleifera on monocrotaline-induced pulmonary hypertension in rats. *Chin J Physiol* 55 (2012) 22-30.
- [32] M. Cheraghi, M. Namdari, H. Daraee, and B. Negahdari, Cardioprotective effect of magnetic hydrogel nanocomposite loaded N, $\alpha$ -L-rhamnopyranosyl vincosamide isolated from Moringa oleifera leaves against doxorubicin-induced cardiac toxicity in rats: in vitro and in vivo studies. *J Microencapsul* 34 (2017) 335-341.
- [33] C.Y. Chin, P.Y. Ng, and S.F. Ng, Moringa oleifera standardized aqueous leaf extract-loaded hydrocolloid film dressing: in vivo dermal safety and wound healing evaluation in STZ/HFD diabetic rat model. *Drug Deliv Transl Res* 9 (2019) 453-468.
- [34] P. Chumark, P. Khunawat, Y. Sanvarinda, S. Phornchirasilp, N.P. Morales, L. Phivthong-Ngam, P. Ratanachamnong, S. Srisawat, and K.U. Pongrapeeporn, The in vitro and ex vivo antioxidant properties, hypolipidaemic and antiatherosclerotic activities of water extract of Moringa oleifera Lam. leaves. *J Ethnopharmacol* 116 (2008) 439-46.
- [35] C. Cui, S. Chen, X. Wang, G. Yuan, F. Jiang, X. Chen, and L. Wang, Characterization of Moringa oleifera roots polysaccharide MRP-1 with anti-inflammatory effect. *Int J Biol Macromol* 132 (2019) 844-851.
- [36] N. Das, K. Sikder, S. Ghosh, B. Fromenty, and S. Dey, Moringa oleifera Lam. leaf extract prevents early liver injury and restores antioxidant status in mice fed with a high-fat diet. *Indian J Exp Biol* 50 (2012) 404-12.
- [37] A.R. Yurre, J. Silva, M. Torres, E.L. Martins, I.P. Ramos, W. Silva, J.D.S. Sarpa, C. Guedes, T.H. Napoleão, L. Coelho, P.M.G. Paiva, and E. Medei, Evaluation of the Cardiac Effects of a Water-Soluble Lectin (Wsmol) from Moringa Oleifera Seeds. *Arq Bras Cardiol* 114 (2020) 1029-1037.
- [38] Z. Dou, C. Chen, and X. Fu, Bioaccessibility, antioxidant activity and modulation effect on gut microbiota of bioactive compounds from Moringa oleifera Lam. leaves during digestion and fermentation in vitro. *Food Funct* 10 (2019) 5070-5079.
- [39] C.O. Edeogu, M.E. Kalu, A.C. Famurewa, N.T. Asogwa, G.N. Onyeji, and K.O. Ikpemo, Nephroprotective Effect of Moringa Oleifera Seed Oil on Gentamicin-Induced Nephrotoxicity in Rats: Biochemical Evaluation of Antioxidant, Anti-inflammatory, and Antiapoptotic Pathways. *J Am Coll Nutr* 39 (2020) 307-315.

- [40] H. El Rabey, J. Khan, F.M. Almutairi, and M. Elbakry, The low dose of drumsticks (*Moringa oleifera* L.) seed powder ameliorates blood cholesterol in the hypercholesterolemic male rat. *Indian Journal of Biochemistry and Biophysics* 54 (2017) 306-313.
- [41] S.M. Ezzat, M.H. El Bishbishy, N.M. Aborehab, M.M. Salama, A. Hasheesh, A.A. Motaal, H. Rashad, and F.M. Metwally, Upregulation of MC4R and PPAR- $\alpha$  expression mediates the anti-obesity activity of *Moringa oleifera* Lam. in high-fat diet-induced obesity in rats. *J Ethnopharmacol* 251 (2020) 112541.
- [42] J.W. Fahey, K.L. Wade, K.K. Stephenson, Y. Shi, H. Liu, A.A. Panjwani, C.R. Warrick, and M.E. Olson, A Strategy to Deliver Precise Oral Doses of the Glucosinolates or Isothiocyanates from *Moringa oleifera* Leaves for Use in Clinical Studies. *Nutrients* 11 (2019).
- [43] X. Gao, Q. Xie, L. Liu, P. Kong, J. Sheng, and H. Xiang, Metabolic adaptation to the aqueous leaf extract of *Moringa oleifera* Lam.-supplemented diet is related to the modulation of gut microbiota in mice. *Appl Microbiol Biotechnol* 101 (2017) 5115-5130.
- [44] S. Ghasi, E. Nwobodo, and J.O. Ofili, Hypocholesterolemic effects of crude extract of leaf of *Moringa oleifera* Lam in high-fat diet-fed Wistar rats. *J Ethnopharmacol* 69 (2000) 21-5.
- [45] A.S. Gouda, N.A. El-Nabarawy and S.F. Ibrahim, *Moringa oleifera* extract (Lam) attenuate Aluminium phosphide-induced acute cardiac toxicity in rats. *Toxicol Rep* 5 (2018) 209-212.
- [46] R. Gupta, M. Mathur, V.K. Bajaj, P. Katariya, S. Yadav, R. Kamal, and R.S. Gupta, Evaluation of antidiabetic and antioxidant activity of *Moringa oleifera* in experimental diabetes. *J Diabetes* 4 (2012) 164-71.
- [47] L. Huang, C. Yuan, and Y. Wang, Bioactivity-guided Identification of Anti-Adipogenic Isothiocyanates in the *Moringa* (*Moringa oleifera*) Seed and Investigation of the Structure-Activity Relationship. *Molecules* 25 (2020).
- [48] Q. Huang, R. Liu, J. Liu, Q. Huang, S. Liu, and Y. Jiang, Integrated Network Pharmacology Analysis and Experimental Validation to Reveal the Mechanism of Anti-Insulin Resistance Effects of *Moringa oleifera* Seeds. *Drug Des Devel Ther* 14 (2020) 4069-4084.
- [49] H. Irfan, M. Abdullah, N. Khan, and A. Sadikun, Effect of Ethanolic Extract of *Moringa oleifera* Lam. Leaves on Body Weight and Hyperglycemia of Diabetic Rats. *Pakistan Journal of Nutrition* 15 (2016) 112-117.
- [50] D. Jaiswal, P.K. Rai, A. Kumar, S. Mehta, and G. Watal, Effect of *Moringa oleifera* Lam. leaves aqueous extract therapy on hyperglycemic rats. *J Ethnopharmacol* 3(2009) 392 - 6.
- [51] D. Jaiswal, P.K. Rai, S. Mehta, S. Chatterji, S. Shukla, D.K. Rai, G. Sharma, B. Sharma, S. Khair, and G. Watal, Role of *Moringa oleifera* in the regulation of diabetes-induced oxidative stress. *Asian Pac J Trop Med* 6 (2013) 426-32
- [52] A. Jaja-Chimedza, B.L. Graf, C. Simmler, Y. Kim, P. Kuhn, G.F. Pauli, and I. Raskin, Biochemical characterization and anti-inflammatory properties of an isothiocyanate-enriched *moringa* (*Moringa oleifera*) seed extract. *PLoS One* 12 (2017) e0182658.
- [53] H. Joung, B. Kim, H. Park, K. Lee, H.-H. Kim, H.-C. Sim, H.-J. Do, C.-K. Hyun, and M.-S. Do, Fermented *Moringa oleifera* decreases hepatic adiposity and ameliorates glucose intolerance in high-fat diet-induced obese mice. *Journal of medicinal food* 20 (2017) 439-447.
- [54] S.R. Khalil, S.M. Abdel-Motal, M. Abd-Elsalam, N.E. Abd El-Hameed, and A. Awad, Restoring strategy of ethanolic extract of *Moringa oleifera* leaves against Tilmicosin-

- induced cardiac injury in rats: Targeting cell apoptosis-mediated pathways. *Gene* 730 (2020) 144272.
- [55] S. Kumar Gupta, B. Kumar, B.P. Srinivasan, T.C. Nag, S. Srivastava, R. Saxena, and A. Aggarwal, Retinoprotective effects of *Moringa oleifera* via antioxidant, anti-inflammatory, and anti-angiogenic mechanisms in streptozotocin-induced diabetic rats. *J Ocul Pharmacol Ther* 29 (2013) 419-26.
- [56] C. Li, Z. Dong, B. Zhang, Q. Huang, G. Liu, and X. Fu, Structural characterization and immune enhancement activity of a novel polysaccharide from *Moringa oleifera* leaves. *Carbohydr Polym* 234 (2020) 115897.
- [57] Y.J. Li, Q.Q. Ji, Z. Wang, L.H. Shen, and B. He, *Moringa oleifera* seeds mitigate myocardial injury and prevent ventricular failure induced by myocardial infarction. *Am J Transl Res* 12 (2020) 4511-4521.
- [58] P.C. Liao, M.H. Lai, K.P. Hsu, Y.H. Kuo, J. Chen, M.C. Tsai, C.X. Li, X.J. Yin, N. Jeyashoke, and L.K. Chao, Identification of  $\beta$ -Sitosterol as in Vitro Anti-Inflammatory Constituent in *Moringa oleifera*. *J Agric Food Chem* 66 (2018) 10748-10759.
- [59] M. López, M. Ríos-Silva, M. Huerta, Y. Cárdenas, J.A. Bricio-Barrios, M.I. Díaz-Reval, Z. Urzúa, M. Huerta-Trujillo, K. López-Quezada, and X. Trujillo, Effects of *Moringa oleifera* leaf powder on metabolic syndrome induced in male Wistar rats: a preliminary study. *J Int Med Res* 46 (2018) 3327-3336.
- [60] T. Luetragoon, R. Pankla Sranujit, C. Noysang, Y. Thongsri, P. Potup, N. Suphrom, N. Nuengchamnon, and K. Usuwanthim, Bioactive Compounds in *Moringa oleifera* Lam. Leaves Inhibit the Pro-Inflammatory Mediators in Lipopolysaccharide-Induced Human Monocyte-derived Macrophages. *Molecules* 25 (2020).
- [61] L. Mabrouki, I. Rjeibi, J. Taleb, and L. Zourgui, Cardiac Ameliorative Effect of *Moringa oleifera* Leaf Extract in High-Fat Diet-Induced Obesity in Rat Model. *Biomed Res Int* 2020 (2020) 6583603.
- [62] H. Madkhali, M. Alharthy, M. Asiri, M. Ganaie, M. Ansari, N.U. Rehman and A. Hamad, *Moringa oleifera* Lam. (family Moringaceae) leaf extract attenuate high-fat diet-induced dyslipidemia and vascular endothelium dysfunction in Wistar albino rats. 18 (2019) 2597-2604.
- [63] M. Mapfumo, B.W. Lembede, A.R. Ndhkala, and E. Chivandi, Effect of crude *Moringa oleifera* Lam. seed extract on the blood markers of metabolic syndrome in high-fructose diet-fed growing Sprague-Dawley rats. *J Complement Integr Med* 17 (2019).
- [64] K. Mehta, R. Balaraman, A.H. Amin, P.A. Bafna, and O.D. Gulati, Effect of fruits of *Moringa oleifera* on the lipid profile of normal and hypercholesterolaemic rabbits. *J Ethnopharmacol* 86 (2003) 191-5.
- [65] A.A. Muhammad, P. Arulselvan, P.S. Cheah, F. Abas, and S. Fakurazi, Evaluation of wound healing properties of bioactive aqueous fraction from *Moringa oleifera* Lam on an experimentally induced diabetic animal model. *Drug Des Devel Ther* 10 (2016) 1715-30.
- [66] G. Murillo, M. Almatrafí, M. Vergara-Jimenez, and M.L. Fernandez, *Moringa* leaf powder modulate reverse cholesterol transport without changing plasma lipids in guinea. *The FASEB Journal* 31 (2017) 647.2-647.2.
- [67] A.O. Nafiu, R.O. Akomolafe, Q.K. Alabi, C.O. Idowu, and O.O. Odujoko, Effect of fatty acids from ethanol extract of *Moringa oleifera* seeds on kidney function impairment and oxidative stress induced by gentamicin in rats. *Biomed Pharmacother* 117 (2019) 109154.

- [68] M. Nandave, S.K. Ojha, S. Joshi, S. Kumari, and D.S. Arya, Moringa oleifera leaf extract prevents isoproterenol-induced myocardial damage in rats: evidence for an antioxidant, antiperoxidative, and cardioprotective intervention. *J Med Food* 12 (2009) 47-55.
- [69] M. Ndong, M. Uehara, S. Katsumata, S. Sato, and K. Suzuki, Preventive effects of Moringa oleifera (Lam) on hyperlipidemia and hepatocyte ultrastructural changes in iron-deficient rats. *Biosci Biotechnol Biochem* 71 (2007) 1826-33.
- [70] O. Ofem, E. Ani, A. Archibong, and J. Ufford, Variations in blood parameters of high salt loaded rats following administration of Moringa oleifera leaf extract. *Trends Med Res* 10 (2015) 97-105.
- [71] L.A. Olayaki, J.E. Irekpita, M.T. Yakubu, and O.O. Ojo, Methanolic extract of Moringa oleifera leaves improves glucose tolerance, glycogen synthesis, and lipid metabolism in alloxan-induced diabetic rats. *J Basic Clin Physiol Pharmacol* 26 (2015) 585-93.
- [72] T.L.C. Oldoni, N. Merlin, T.C. Bicas, A. Prasniewski, S.T. Carpes, J. Ascari, S.M. de Alencar, A.P. Massarioli, M.D. Bagatini, R. Morales, and G. Thomé, Antihyperglycemic activity of crude extract and isolation of phenolic compounds with antioxidant activity from Moringa oleifera Lam. leaves grown in Southern Brazil. *Food Res Int* 141 (2021) 110082.
- [73] E.I. Omodanisi, Y.G. Aboua, and O.O. Oguntibeju, Assessment of the Anti-Hyperglycaemic, Anti-Inflammatory and Antioxidant Activities of the Methanol Extract of Moringa Oleifera in Diabetes-Induced Nephrotoxic Male Wistar Rats. *Molecules* 22 (2017).
- [74] M. Ouédraogo, A. Lamien-Sanou, N. Ramdé, A.S. Ouédraogo, M. Ouédraogo, S.P. Zongo, O. Goubri, P. Duez, and P.I. Guissou, Protective effect of Moringa oleifera leaves against gentamicin-induced nephrotoxicity in rabbits. *Experimental and Toxicologic Pathology* 65 (2013) 335-339.
- [75] S. Panda, A. Kar, P. Sharma, and A. Sharma, Cardioprotective potential of N,  $\alpha$ -1-rhamnopyranosyl vincosamide, an indole alkaloid, isolated from the leaves of Moringa oleifera in isoproterenol-induced cardiotoxic rats: In vivo and in vitro studies. *Bioorganic & medicinal chemistry letters* 23 (2013) 959-962.
- [76] S. Panda, Butanolic fraction of Moringa oleifera Lam. (Moringaceae) attenuates isoproterenol-induced cardiac necrosis and oxidative stress in rats: an EPR study. *EXCLI journal* 14 (2015) 64.
- [77] P.C. Paula, D.O. Sousa, J.T. Oliveira, A.F. Carvalho, B.G. Alves, M.L. Pereira, D.F. Farias, M.P. Viana, F.A. Santos, and T.C. Morais, A protein isolate from Moringa oleifera leaves has hypoglycemic and antioxidant effects in alloxan-induced diabetic mice. *Molecules* 22 (2017) 271.
- [78] M. Rajanandh, M. Satishkumar, K. Elango, and B. Suresh, Moringa oleifera Lam. Herbal medicine for hyperlipidemia: A preclinical report. *Asian Pacific Journal of Tropical Disease* 2 (2012) S790-S795.
- [79] J.I. Randriamboavonjy, G. Loirand, N. Vaillant, B. Lauzier, S. Derbré, S. Michalet, P. Pacaud, and A. Tesse, Cardiac protective effects of Moringa oleifera seeds in spontaneously hypertensive rats. *American journal of hypertension* 29 (2016) 873-881.
- [80] J.I. Randriamboavonjy, M. Rio, P. Pacaud, G. Loirand, and A. Tesse, Moringa oleifera seeds attenuate vascular oxidative and nitrosative stresses in spontaneously hypertensive rats. *Oxidative medicine and cellular longevity* 2017 (2017).
- [81] V. Reddy, A. Urooj, S. Sairam, F. Ahmed, and N. Prasad, Hypocholesterolemic effect of Moringa oleifera polyphenols in rats fed high fat-cholesterol diet. *Malaysian Journal of Nutrition* 23 (2017) 473-478.

- [82] W.A. Saka, T.E. Ayoade, T.M. Akhigbe, and R.E. Akhigbe, Moringa oleifera seed oil partially abrogates 2, 3-dichlorovinyl dimethyl phosphate (Dichlorvos)-induced cardiac injury in rats: evidence for the role of oxidative stress. *Journal of Basic and Clinical Physiology and Pharmacology* 32 (2021) 237-246.
- [83] W. Sangkitikomol, A. Rocejanasaroj, and T. Tencomnao, Effect of Moringa oleifera on advanced glycation end-product formation and lipid metabolism gene expression in HepG2 cells. *Genetics and Molecular Research* 13 (2014) 723-735.
- [84] S. SHAIKH, S. SHAIKH, F. SAYYED, P. KHAN, S. SHAIKH, and S. JAMKHEDKAR, Traditional plants: in vitro analysis of medicinal properties. *International Journal of Pharmaceutical Research* (2020).
- [85] H.N. Sholapur, and B.M. Patil, Effect of Moringa oleifera bark extracts on dexamethasone-induced insulin resistance in rats. *Drug Res (Stuttg)* 63 (2013) 527-31.
- [86] M. Sinha, D.K. Das, S. Bhattacharjee, S. Majumdar, and S. Dey, Leaf extract of Moringa oleifera prevents ionizing radiation-induced oxidative stress in mice. *J Med Food* 14 (2011) 1167-72.
- [87] M.M. Soliman, A. Aldhahrani, A. Alkhedaide, M.A. Nassan, F. Althobaiti, and W.A. Mohamed, The ameliorative impacts of Moringa oleifera leaf extract against oxidative stress and methotrexate-induced hepato-renal dysfunction. *Biomedicine & Pharmacotherapy* 128 (2020) 110259.
- [88] C. Sun, W. Li, Y. Liu, W. Deng, M. Adu-Frimpong, H. Zhang, Q. Wang, J. Yu, and X. Xu, In vitro/in vivo hepatoprotective properties of 1-O-(4-hydroxymethylphenyl)- $\alpha$ -L-rhamnopyranoside from Moringa oleifera seeds against carbon tetrachloride-induced hepatic injury. *Food and Chemical Toxicology* 131 (2019) 110531.
- [89] W.S. Tan, P. Arulselman, G. Karthivashan, and S. Fakurazi, Moringa oleifera flower extract suppresses the activation of inflammatory mediators in lipopolysaccharide-stimulated RAW 264.7 macrophages via NF- $\kappa$ B pathway. *Mediators of inflammation* 2015 (2015).
- [90] Y. Tang, E.-J. Choi, W.C. Han, M. Oh, J. Kim, J.-Y. Hwang, P.-J. Park, S.-H. Moon, Y.-S. Kim, and E.-K. Kim, Moringa oleifera from Cambodia ameliorates oxidative stress, hyperglycemia, and kidney dysfunction in type 2 diabetic mice. *Journal of medicinal food* 20 (2017) 502-510.
- [91] H. Tian, Y. Liang, G. Liu, Y. Li, M. Deng, D. Liu, Y. Guo, and B. Sun, Moringa oleifera polysaccharides regulates caecal microbiota and small intestinal metabolic profile in C57BL/6 mice. *International Journal of Biological Macromolecules* 182 (2021) 595-611.
- [92] S. Umar, Z. Mohammed, A. Nuhu, K. Musa, and Y. Tanko, Evaluation of Hypoglycaemic and Antioxidant Activity of Moringa oleifera Root in Normal and Alloxan-Induced Diabetic Rats. *Trop J Nat Prod Res* 2 (2018) 401-408.
- [93] O.W. Vargas-Tineo, D.M. Segura-Muñoz, L.K. Becerra-Gutiérrez, J.P. Amado-Tineo, and H. Silva-Díaz, Efecto hipoglicemiante de Moringa oleifera (moringa) comparado con smallanthus sonchifolius (yacón) en Rattus norvegicus con diabetes mellitus inducida. *Revista Peruana de Medicina Experimental y Salud Pública* 37 (2020) 478-484.
- [94] M.K. Velaga, L.K. Daughtry, A.C. Jones, P.R. Yallapragada, S. Rajanna, and B. Rajanna, Attenuation of lead-induced oxidative stress in rat brain, liver, kidney, and blood of male Wistar rats by Moringa oleifera seed powder. *Journal of Environmental Pathology, Toxicology and Oncology* 33 (2014).
- [95] N. Vera-Nunez, A.R. Guirao, J.D.F. SILVA, I.P. Ramos, M.K. Torres, L.C.B. Coelho, T.H. Napoleão, P. PAIVA, G. MARIA, and E. MEDEI, Water-soluble lectin (WSMoL) from

- Moringa oleifera seeds treatment recovers glycemic levels and improves left ventricular ejection fraction on Type-2 Diabetes mice model. *Anais da Academia Brasileira de Ciências* 93 (2021).
- [96] A. Villarruel-López, D. López-de la Mora, O. Vázquez-Paulino, A. Puebla-Mora, M.R. Torres-Vitela, L. Guerrero-Quiroz, and K. Nuño, Effect of Moringa oleifera consumption on diabetic rats. *BMC complementary and alternative medicine* 18 (2018) 1-10.
- [97] F. Wang, Y. Bao, X. Shen, G. Zengin, Y. Lyu, J. Xiao, and Z. Weng, Niazirin from Moringa oleifera Lam. attenuates high glucose-induced oxidative stress through PKC $\zeta$ /Nox4 pathway. *Phytomedicine* (2019) 153066.
- [98] F. Wang, Y.-F. Bao, J.-J. Si, Y. Duan, Z.-B. Weng, and X.-C. Shen, The beneficial effects of a polysaccharide from Moringa oleifera leaf on gut microecology in mice. *Journal of medicinal food* 22 (2019) 907-918.
- [99] F. Wang, H.-H. Zhong, W.-K. Chen, Q.-P. Liu, C.-Y. Li, Y.-F. Zheng, and G.-P. Peng, Potential hypoglycaemic activity phenolic glycosides from Moringa oleifera seeds. *Natural product research* 31 (2017) 1869-1874.
- [100] C. Waterman, P. Rojas-Silva, T.B. Tumer, P. Kuhn, A.J. Richard, S. Wicks, J.M. Stephens, Z. Wang, R. Mynatt, and W. Cefalu, Isothiocyanate-rich Moringa oleifera extract reduces weight gain, insulin resistance, and hepatic gluconeogenesis in mice. *Molecular nutrition & food research* 59 (2015) 1013-1024.
- [101] Y. Yang, C.-Y. Shi, J. Xie, J.-H. Dai, S.-L. He, and Y. Tian, Identification of potential dipeptidyl peptidase (DPP)-IV inhibitors among Moringa oleifera phytochemicals by virtual screening, molecular docking analysis, ADME/T-based prediction, and in vitro analyses. *Molecules* 25 (2020) 189.
- [102] H.D. Yassa and A.F. Tohamy, Extract of Moringa oleifera leaves ameliorates streptozotocin-induced Diabetes mellitus in adult rats. *Acta Histochemica* 116 (2014) 844-854.
- [103] P. Anthanont, N. Lumlerdkij, P. Akarasreenont, S. Vannasaeng, and A. Sriwijitkamol, Moringa Oleifera Leaf Increases Insulin Secretion after Single Dose Administration: A Preliminary Study in Healthy Subjects. *J Med Assoc Thai* 99 (2016) 308-13.
- [104] M. Dominguez-Rodriguez, N.G. Valenzuela-Rubio, D.A. Ochoa-Acosta, J.A. Fierros-Valdez, F.H. Castro-Sanchez, and M. Vergara-Jimenez, The Effect of Moringa Oleifera Leaves in Anthropometric and Biochemical Parameters in Obese Type 2 Diabetes Mellitus Subjects. *The FASEB Journal* 30 (2016) 1176.21-1176.21.
- [105] C.A. Ifeoma, Effect of moringa oleifera leaves on the blood glucose, blood pressure, lipid profile and hematological parameters of type 2 diabetics in a rural Nigerian community., *South African Medical Research Council*, 2020, pp. PACTR202005626842621.
- [106] A. Leone, S. Bertoli, S. Di Lello, A. Bassoli, S. Ravasenghi, G. Borgonovo, F. Forlani, and A. Battezzati, Effect of Moringa oleifera Leaf Powder on Postprandial Blood Glucose Response: In Vivo Study on Saharawi People Living in Refugee Camps. *Nutrients* 10 (2018).
- [107] M.A.S. Sandoval, and C.A. Jimeno, Effect of malunggay (Moringa oleifera) capsules on lipid and glucose levels. *Acta Medica Philippina* 47 (2013).
- [108] R. Taweerutchana, N. Lumlerdkij, S. Vannasaeng, P. Akarasreenont, and A. Sriwijitkamol, Effect of Moringa oleifera Leaf Capsules on Glycemic Control in Therapy-Naïve Type 2 Diabetes Patients: A Randomized Placebo-Controlled Study. *Evid Based Complement Alternat Med* 2017 (2017) 6581390-6581390.
